# Supplementary material for: I2 mediated synthesis of 5-substituted-3-methyl/benzyl-1,3,4-oxadiazol-2(3H)-ones via sequential condensation/oxidative cyclization and rearrangement
Source: Royal Society of Chemistry journal article supplement (doi:10.1039/c5ob02667a), 2016-01-01
Supplement: c5ob02667a1.pdf [file c5ob02667a1.pdf]

## Supporting Information

### **I<sub>2</sub> mediated synthesis of 5-substituted-3-methyl/benzyl-1,3,4-oxadiazol-2(3*H*)-ones via sequential condensation/oxidative cyclization and rearrangement**

Shyam Sunder Patel,<sup>a</sup> Nisha Chandna,<sup>a</sup> Shreemoyee Kumar,<sup>a</sup> and Nidhi Jain<sup>\*a</sup>

Department of Chemistry, Indian Institute of Technology, New Delhi-110016

<sup>\*</sup>E-mail: njain@chemistry.iitd.ac.in

#### **List of Contents:**

|                                     |        |
|-------------------------------------|--------|
| 1. Crystallographic description     | S1-S3  |
| 2. Spectra of synthesized compounds | S4-S33 |

#### **Crystallographic Description:**

Data Collection and Refinement Single-crystal X-ray data of compounds was collected on Bruker SMART CCD Diffractometer using graphite monochromated MoK $\alpha$  radiation ( $\lambda = 0.71073$  Å). Frames were collected at T = 298 K by  $\omega$ ,  $\phi$ , and  $2\theta$ -rotations with full quadrant data collection strategy (four domains each with 600 frames) at 10s per frame with SMART. The measured intensities were reduced to  $F^2$  and corrected for absorption with SADABS.<sup>1</sup> Structure solution, refinement, and data output were carried out with the SHELXTL package by direct methods.<sup>2</sup> Non-hydrogen atoms were refined anisotropically using the WinGX (version 1.80.05) program package.<sup>3</sup> All non-hydrogen atoms were refined anisotropically and hydrogen atoms were treated as riding atoms using SHELX default parameters. Molecular structures were drawn using ORTEP software shown in figure S1. Further information on the crystal structure determination (excluding structure factors) has been given as table S1 and also deposited in the Cambridge Crystallographic Data Centre as supplementary publications no. 1420804. Copies of the data can be obtained free of charge upon application to CCDC, 12 Union Road, Cambridge CB2 1EZ, UK (fax: (+44) 1223-336-033. e-mail: deposit@ccdc.cam.ac.uk) or via internet.

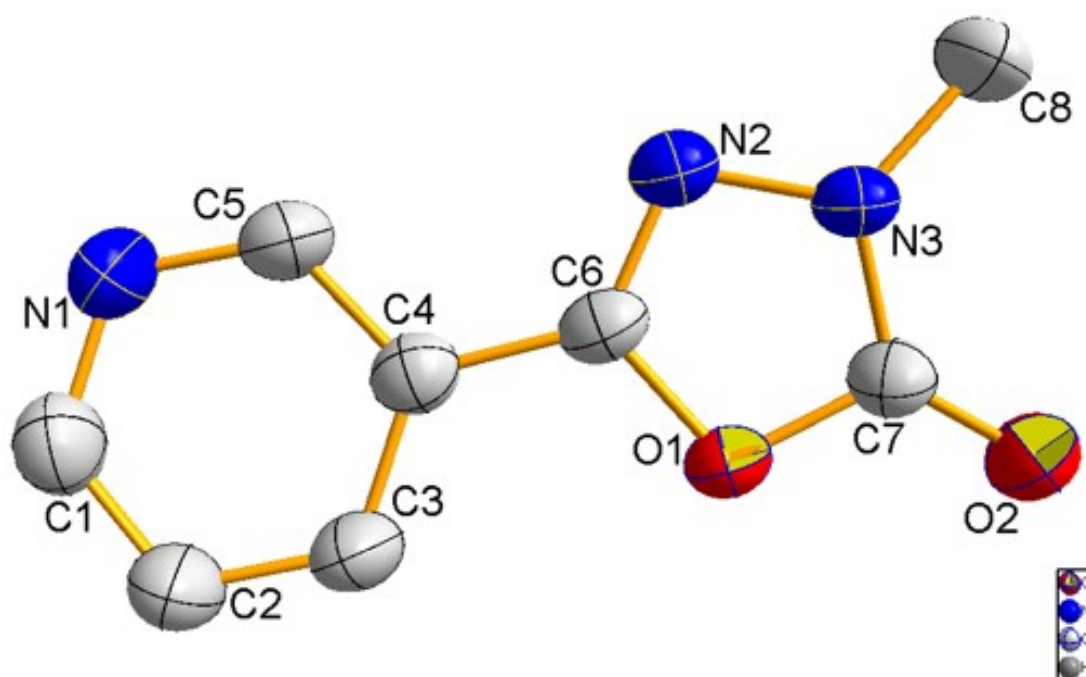

**Fig. S1** ORTEP diagram of Compound **4q**

**Crystallographic description of 3-methyl-5-(pyridin-3-yl)-1,3,4-oxadiazol-2(3H)-one (4q) (Table S1):**

|                                   |                                                                                                                  |
|-----------------------------------|------------------------------------------------------------------------------------------------------------------|
| Identification code               |                                                                                                                  |
| Empirical formula                 | C <sub>8</sub> H <sub>7</sub> N <sub>3</sub> O <sub>2</sub>                                                      |
| Formula weight                    | 177.17                                                                                                           |
| Temperature                       | 298(2) K                                                                                                         |
| Wavelength                        | 0.71073 Å                                                                                                        |
| Crystal system                    | Triclinic                                                                                                        |
| Space group                       | P -1                                                                                                             |
| Unit cell dimensions              | a = 5.7205(15) Å      a = 72.891(4)°<br>b = 7.824(2) Å      b = 85.142(4)°<br>c = 9.811(3) Å      g = 74.695(4)° |
| Volume                            | 404.79(19) Å <sup>3</sup>                                                                                        |
| Z                                 | 2                                                                                                                |
| Density (calculated)              | 1.454 Mg/m <sup>3</sup>                                                                                          |
| Absorption coefficient            | 0.109 mm <sup>-1</sup>                                                                                           |
| F(000)                            | 184.0                                                                                                            |
| Crystal size                      | 0.53 x 0.34 x 0.13 mm <sup>3</sup>                                                                               |
| Theta range for data collection   | 3.03 to 24.98°.                                                                                                  |
| Index ranges                      | -6<=h<=6, -9<=k<=9, -11<=l<=11                                                                                   |
| Reflections collected             | 3825                                                                                                             |
| Independent reflections           | 1419 [R(int) = 0.0314]                                                                                           |
| Completeness to theta = 24.98°    | 98.9 %                                                                                                           |
| Absorption correction             | None                                                                                                             |
| Refinement method                 | Full-matrix least-squares on F <sup>2</sup>                                                                      |
| Data / restraints / parameters    | 1419 / 0 / 119                                                                                                   |
| Goodness-of-fit on F <sup>2</sup> | 1.048                                                                                                            |
| Final R indices [I>2sigma(I)]     | R1 = 0.0567, wR2 = 0.1481                                                                                        |
| R indices (all data)              | R1 = 0.0745, wR2 = 0.1581                                                                                        |
| Largest diff. peak and hole       | 0.287 and -0.174 e.Å <sup>-3</sup>                                                                               |

**<sup>1</sup>HNMR and <sup>13</sup>CNMR Spectra of synthesized compounds****3-methyl-5-phenyl-1,3,4-oxadiazol-2(3H)-one (4a):**

18

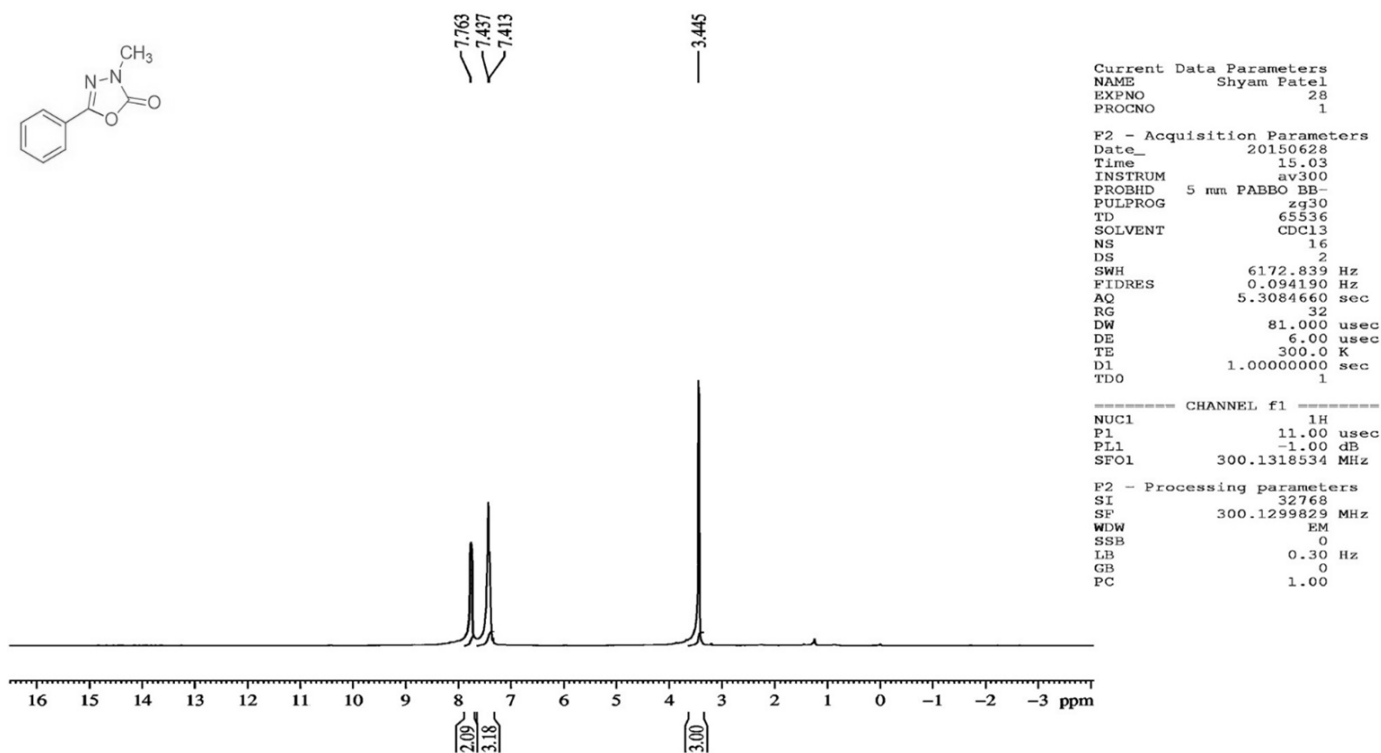

### 3-methyl-5-phenyl-1,3,4-oxadiazol-2(3H)-one (4a):

18

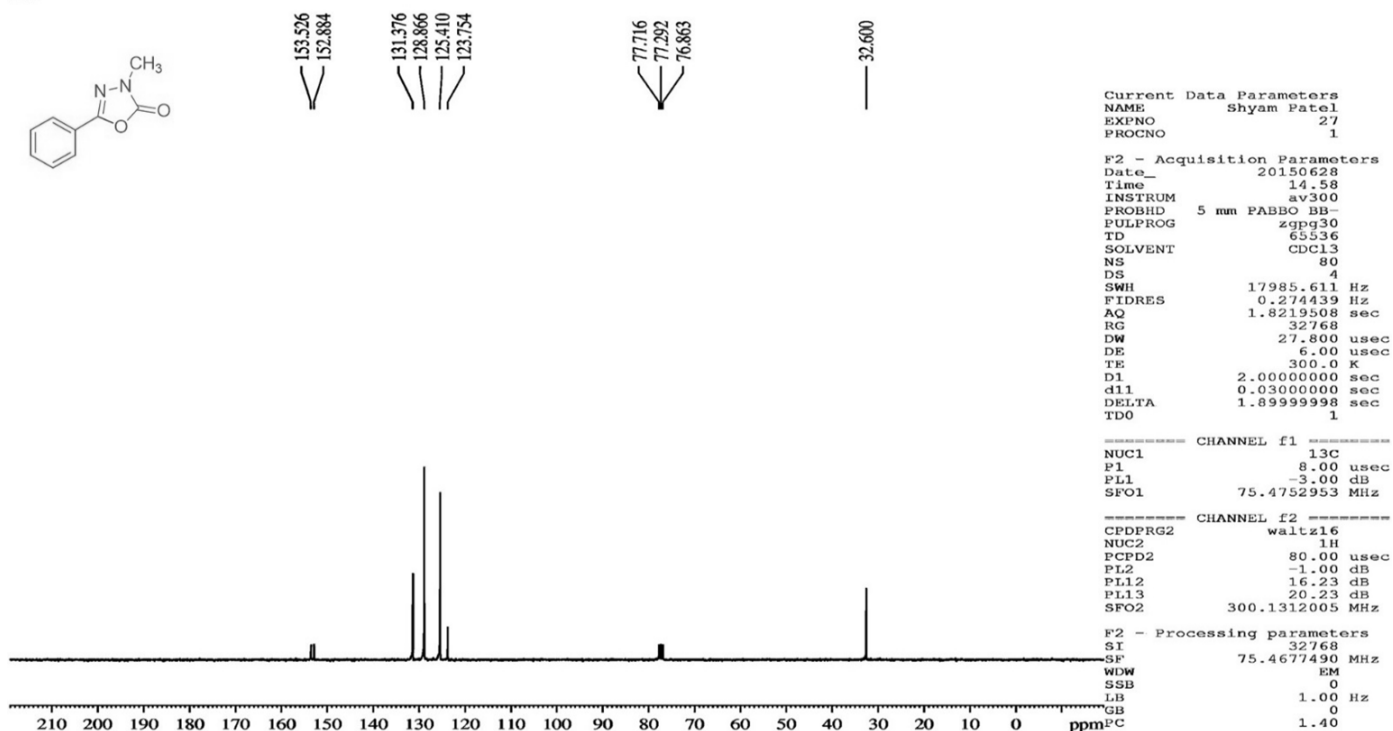

### 5-(4-methoxyphenyl)-3-methyl-1,3,4-oxadiazol-2(3H)-one (4b):



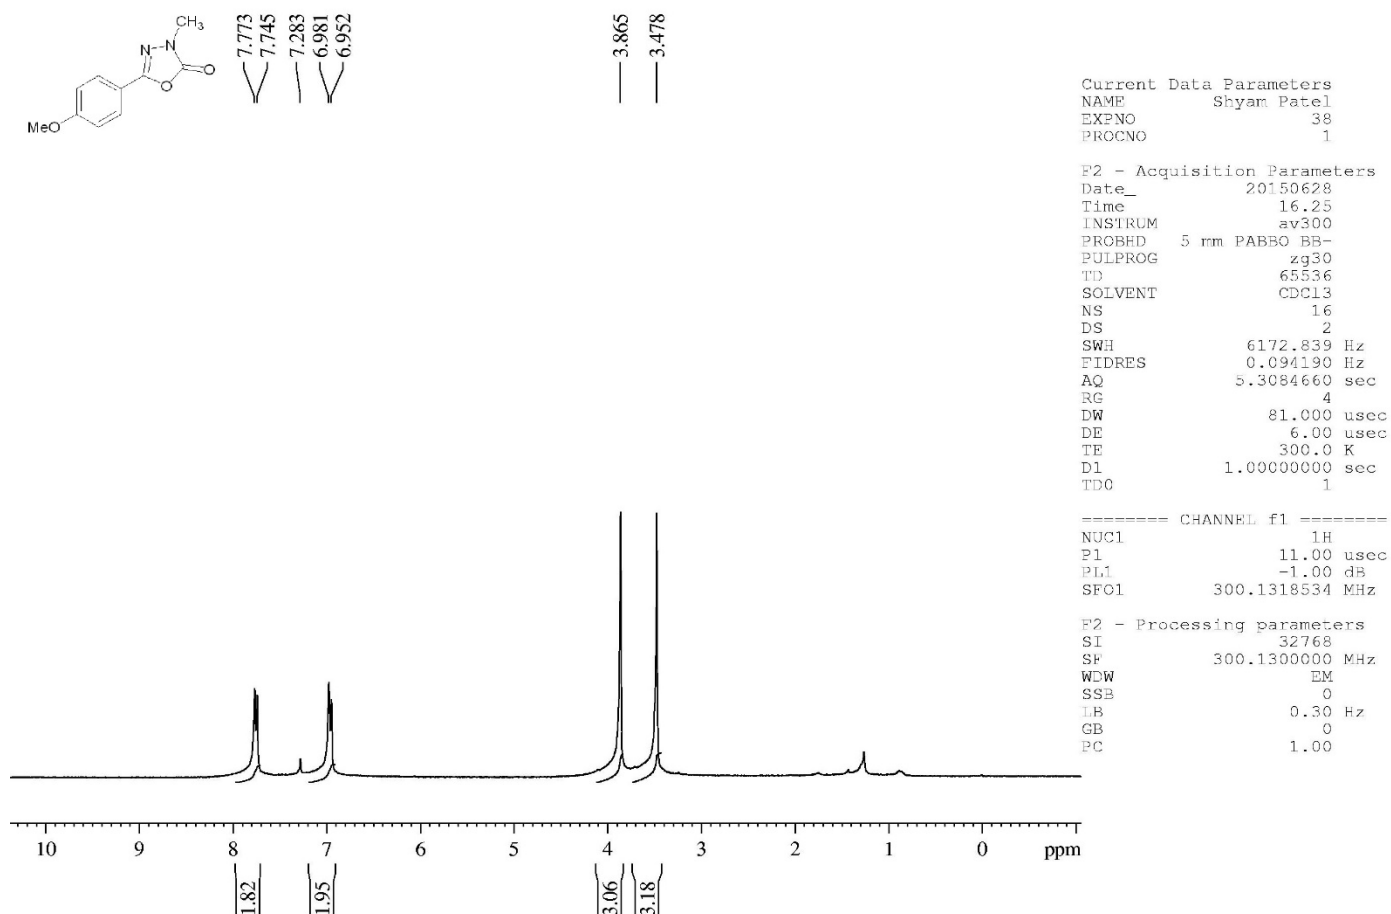

### 5-(4-methoxyphenyl)-3-methyl-1,3,4-oxadiazol-2(3H)-one (4b):

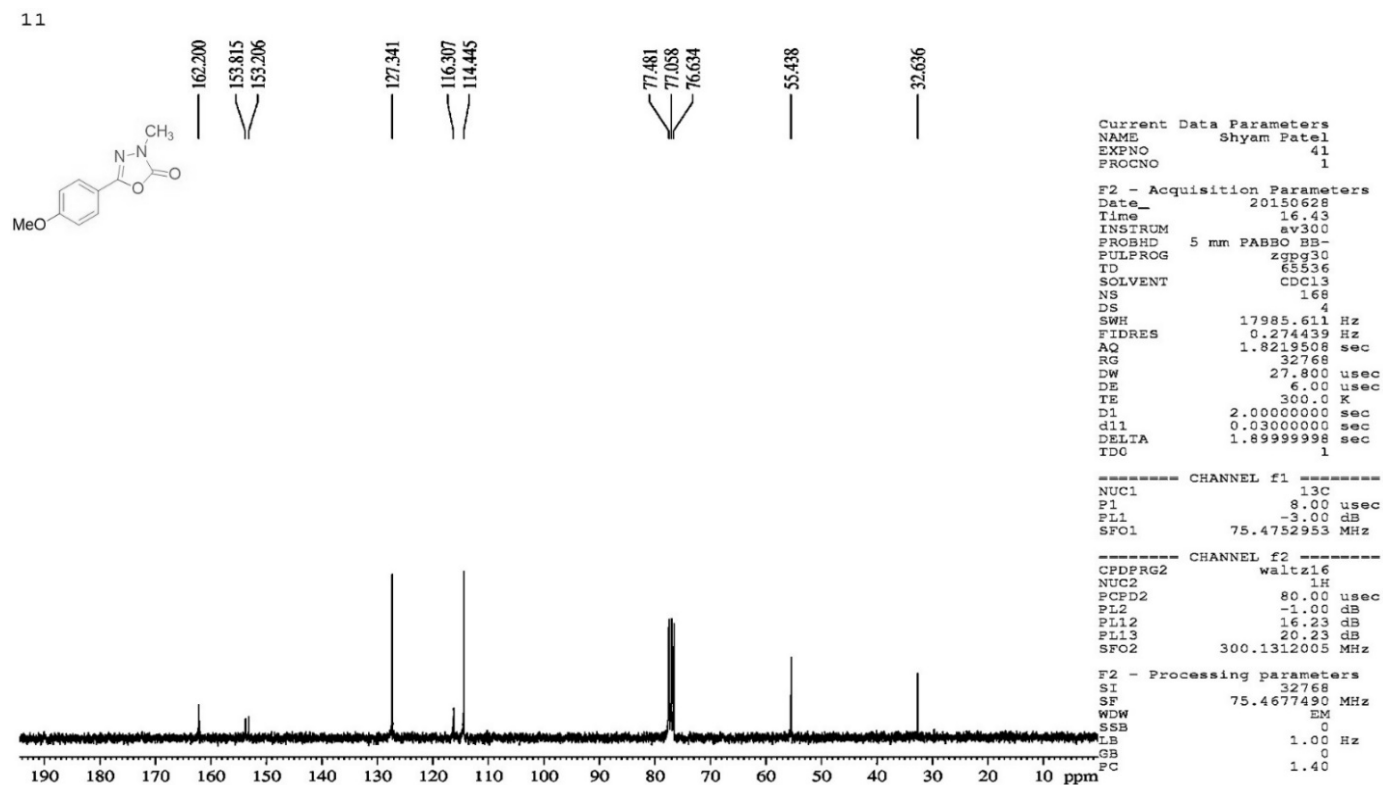

## 3-methyl-5-(p-tolyl)-1,3,4-oxadiazol-2(3H)-one (4c):

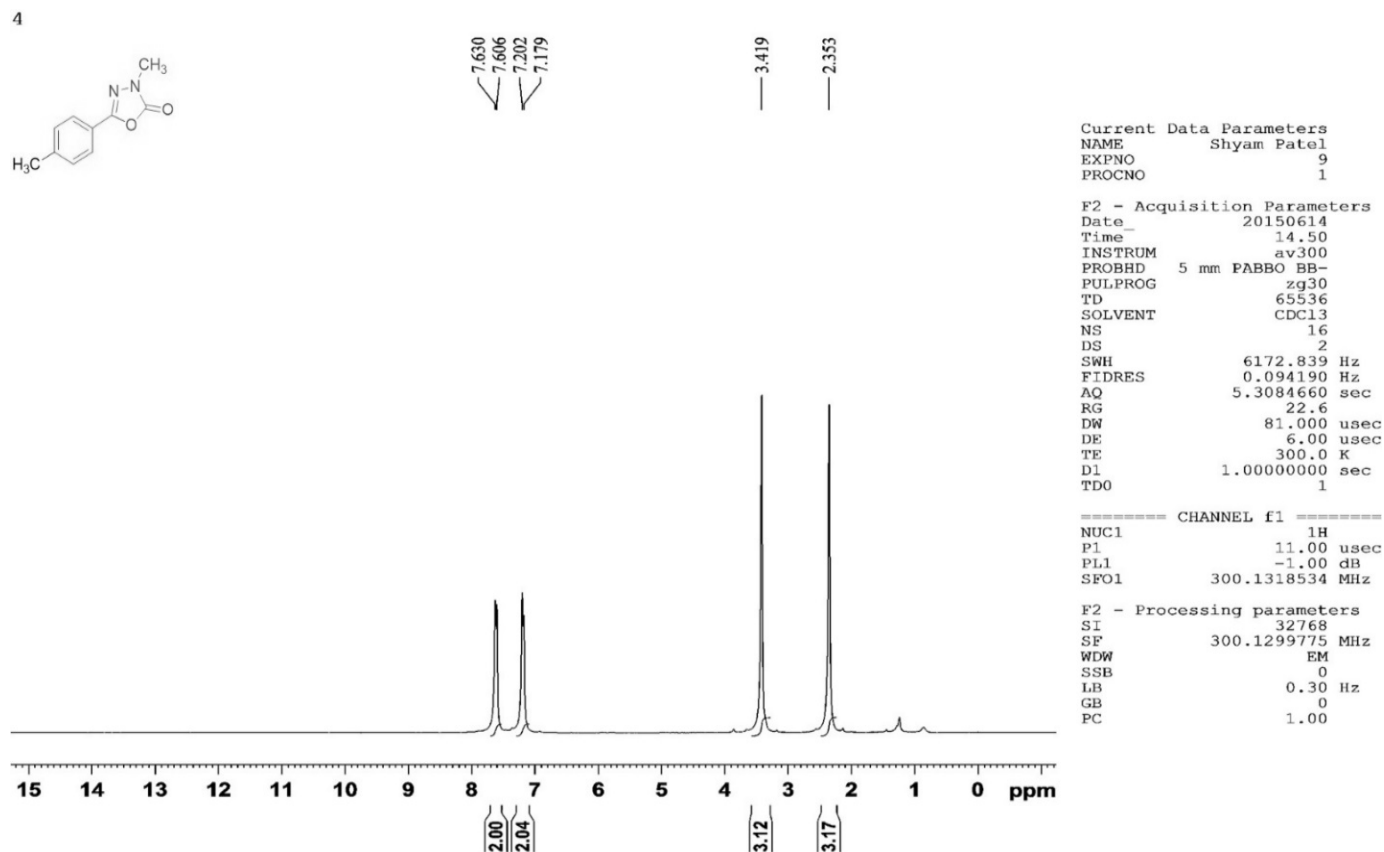

## 3-methyl-5-(p-tolyl)-1,3,4-oxadiazol-2(3H)-one (4c):

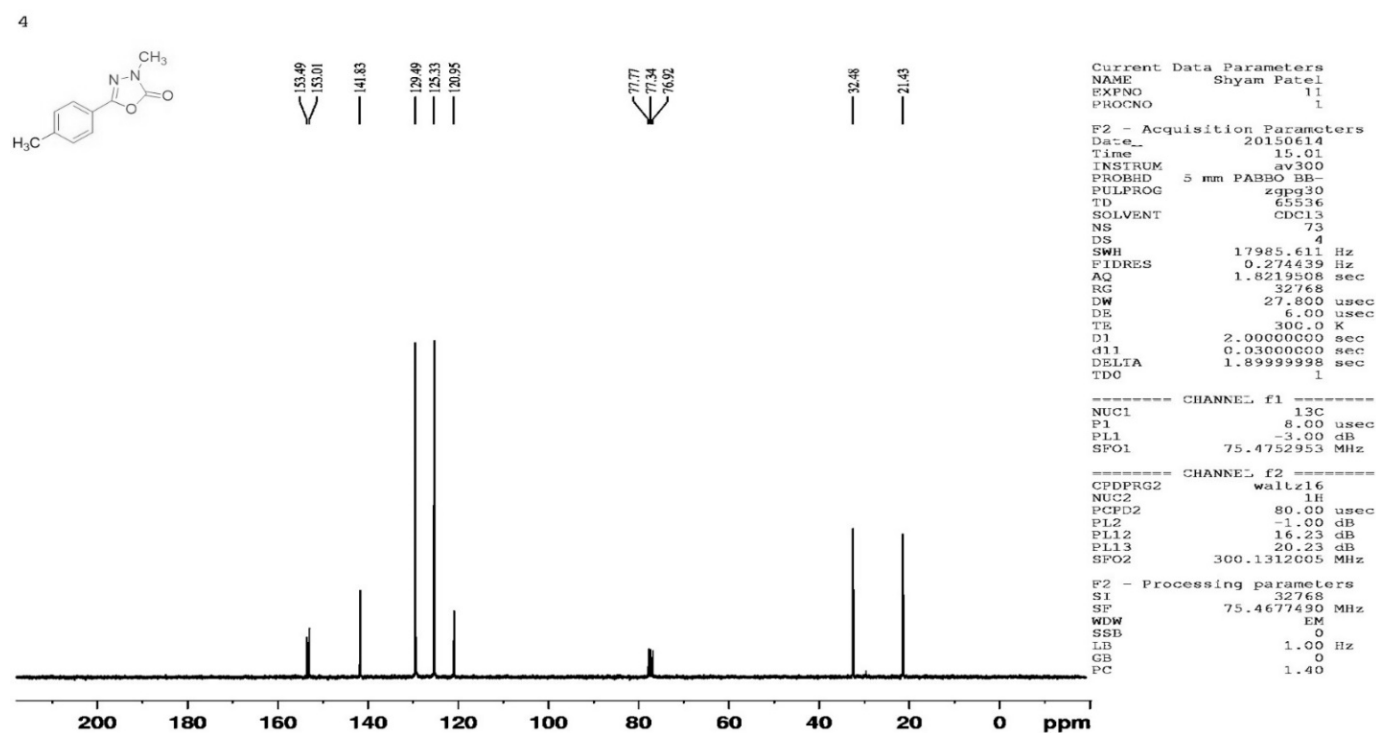

## 5-(4-bromophenyl)-3-methyl-1,3,4-oxadiazol-2(3H)-one (4d):

9

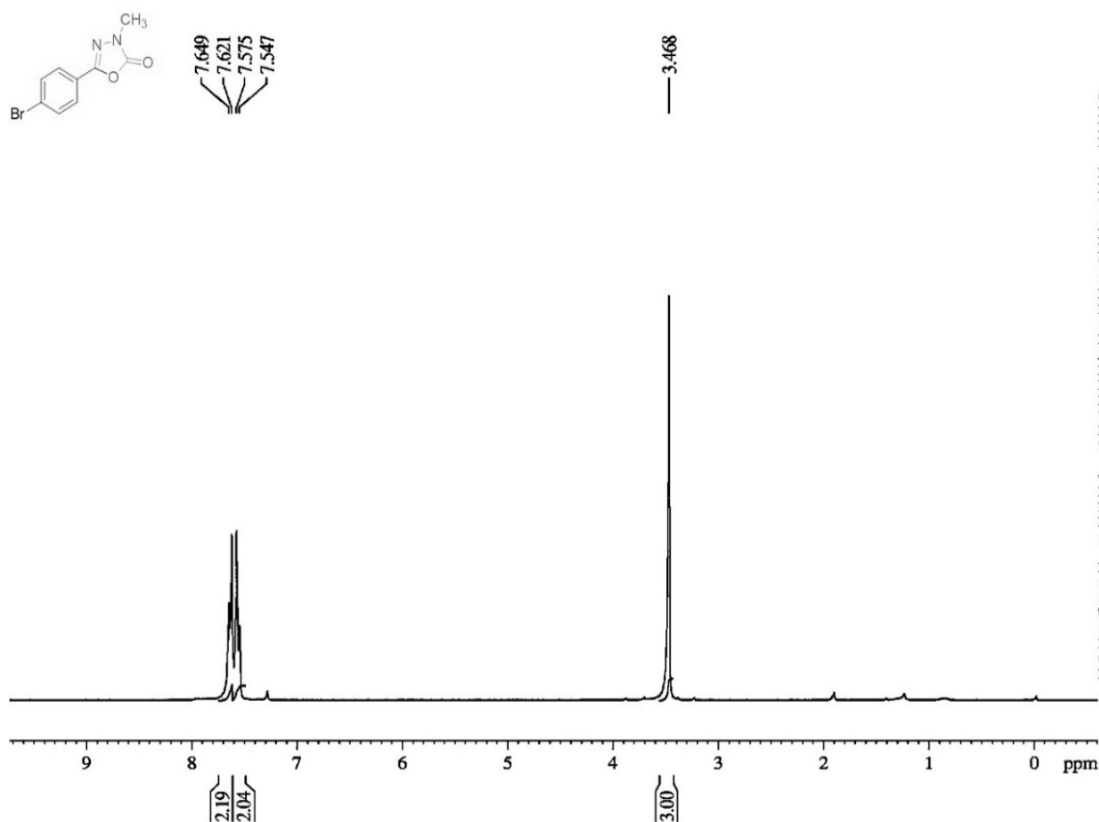

Current Data Parameters  
NAME Shyam Patel  
EXPNO 21  
PROCNO 1

F2 - Acquisition Parameters  
Date\_ 20150628  
Time 14.33  
INSTRUM av300  
PROBHD 5 mm PABBO BB-  
PULPROG zg30  
TD 65536  
SOLVENT CDCl3  
NS 11  
DS 2  
SWH 6172.839 Hz  
FIDRES 0.094190 Hz  
AQ 5.3084660 sec  
RG 35.9  
DW 81.000 usec  
DE 6.00 usec  
TE 300.0 K  
D1 1.00000000 sec  
TDO 1

----- CHANNEL f1 -----  
NUC1 1H  
P1 11.00 usec  
PL1 -1.00 dB  
SFO1 300.1318534 MHz

F2 - Processing parameters  
SI 32768  
SF 300.1300000 MHz  
WDW EM  
SSB 0  
LB 0.30 Hz  
GB 0  
PC 1.00

## 5-(4-bromophenyl)-3-methyl-1,3,4-oxadiazol-2(3H)-one (4d):

9

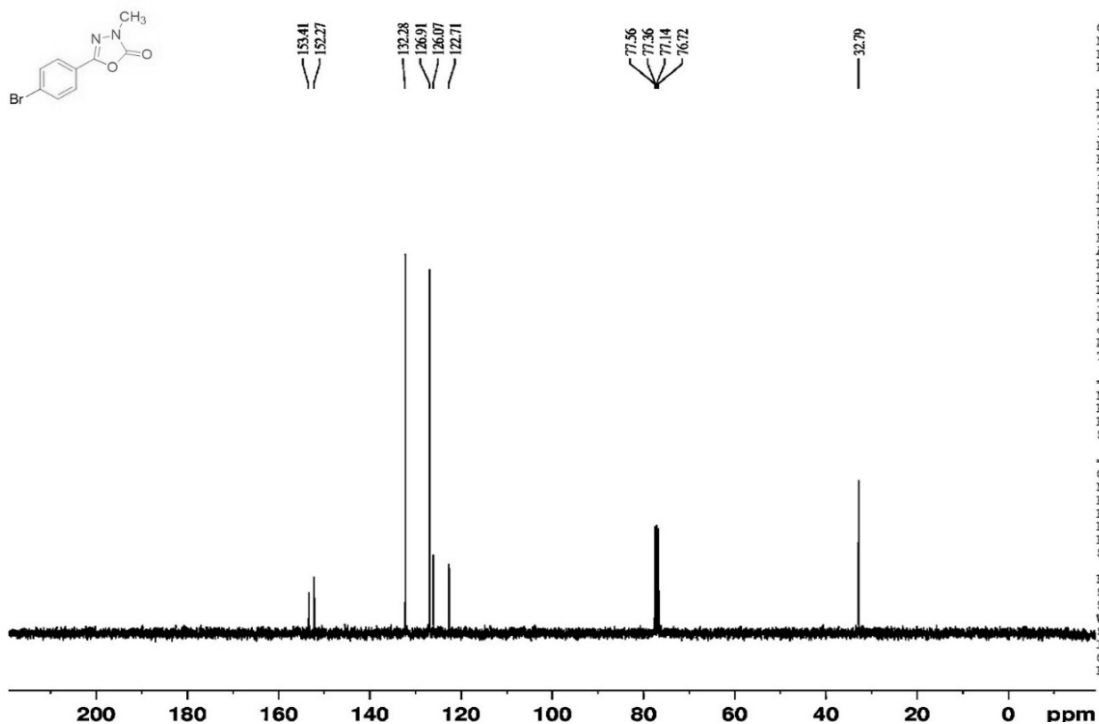

Current Data Parameters  
NAME Shyam Patel  
EXPNO 20  
PROCNO 1

F2 - Acquisition Parameters  
Date\_ 20150618  
Time 18.33  
INSTRUM av300  
PROBHD 5 mm PABBO BB-  
PULPROG zgpg30  
TD 65536  
SOLVENT CDCl3  
NS 38  
DS 4  
SWH 17985.611 Hz  
FIDRES 0.274439 Hz  
AQ 1.8219508 sec  
RG 32768  
DW 27.800 usec  
DE 6.00 usec  
TE 300.0 K  
D1 2.00000000 sec  
d11 0.03000000 sec  
DELTA 1.89999998 sec  
TDO 1

----- CHANNEL f1 -----  
NUC1 13C  
P1 8.00 usec  
PL1 -3.00 dB  
SFO1 75.4752953 MHz

----- CHANNEL f2 -----  
CPDPRG2 waltz16  
NUC2 1H  
PCPD2 80.00 usec  
PL2 -1.00 dB  
PL12 16.23 dB  
PL13 20.23 dB  
SFO2 300.1312005 MHz

F2 - Processing parameters  
SI 32768  
SF 75.4677490 MHz  
WDW EM  
SSB 0  
LB 1.00 Hz  
GB 0  
PC 1.40

## 5-(3-bromophenyl)-3-methyl-1,3,4-oxadiazol-2(3H)-one (4e):

10

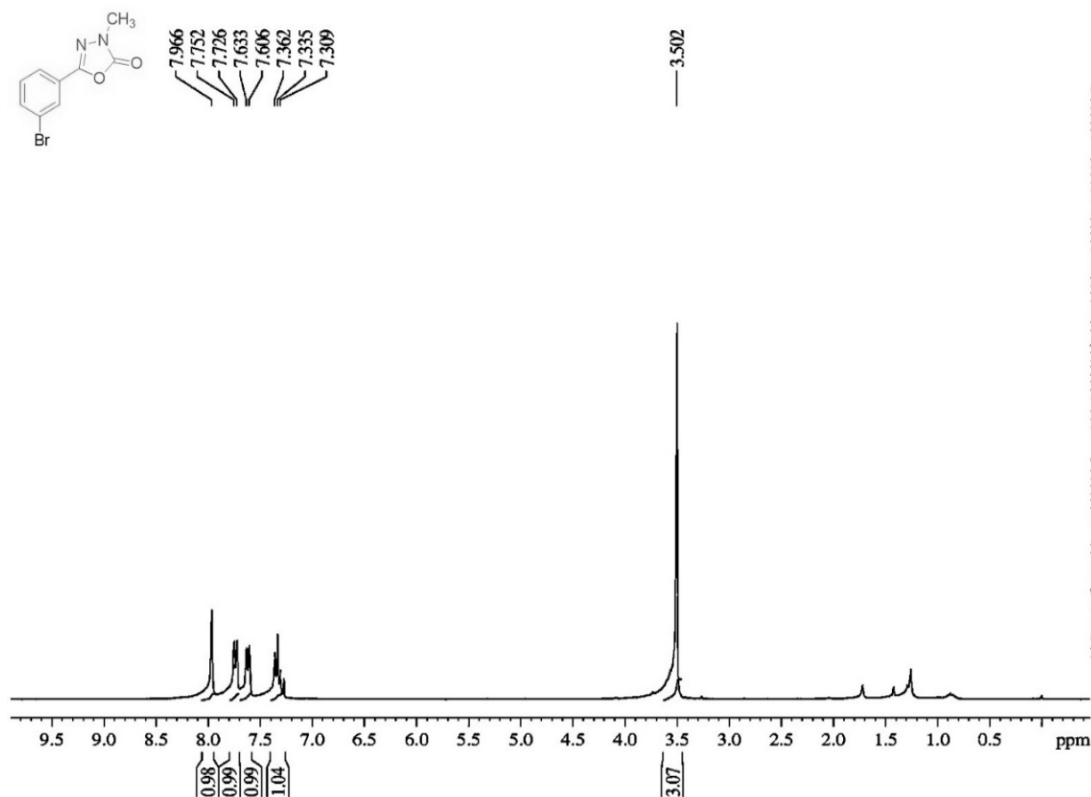

Current Data Parameters  
 NAME Shyam Patel  
 EXPNO 26  
 PROCNO 1

F2 - Acquisition Parameters  
 Date\_ 20150628  
 Time 14.49  
 INSTRUM av300  
 PROBHD 5 mm PABBO BB-  
 PULPROG zg30  
 TD 65536  
 SOLVENT CDCl3  
 NS 16  
 DS 2  
 SWH 6172.839 Hz  
 FIDRES 0.094190 Hz  
 AQ 5.3084660 sec  
 RG 114  
 DW 81.000 usec  
 DE 6.00 usec  
 TE 300.0 K  
 D1 1.00000000 sec  
 TD0 1

----- CHANNEL f1 -----  
 NUC1 1H  
 P1 11.00 usec  
 PL1 -1.00 dB  
 SFO1 300.1318534 MHz

F2 - Processing parameters  
 SI 32768  
 SF 300.1300019 MHz  
 WDW EM  
 SSB 0  
 LB 0.30 Hz  
 GB 0  
 PC 1.00

## 5-(3-bromophenyl)-3-methyl-1,3,4-oxadiazol-2(3H)-one (4e):

10

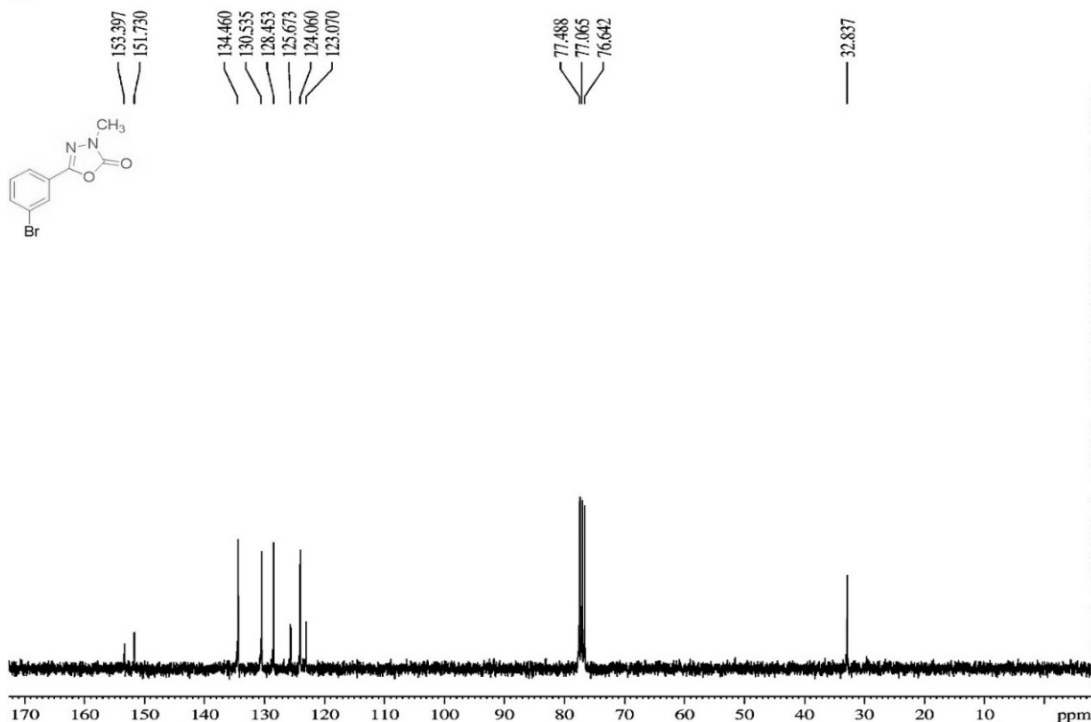

Current Data Parameters  
 NAME Shyam Patel  
 EXPNO 25  
 PROCNO 1

F2 - Acquisition Parameters  
 Date\_ 20150628  
 Time 14.44  
 INSTRUM av300  
 PROBHD 5 mm PABBO BB-  
 PULPROG zgpg30  
 TD 65536  
 SOLVENT CDCl3  
 NS 108  
 DS 4  
 SWH 17985.611 Hz  
 FIDRES 0.274439 Hz  
 AQ 1.8219508 sec  
 RG 32768  
 DW 27.800 usec  
 DE 6.00 usec  
 TE 300.0 K  
 D1 2.00000000 sec  
 d11 0.03000000 sec  
 DELTA 1.89999998 sec  
 TD0 1

----- CHANNEL f1 -----  
 NUC1 13C  
 P1 8.00 usec  
 PL1 -3.00 dB  
 SFO1 75.4752953 MHz

----- CHANNEL f2 -----  
 CPDPRG2 waltz16  
 NUC2 1H  
 PCPD2 80.00 usec  
 PL2 -1.00 dB  
 PL12 16.23 dB  
 PL13 20.23 dB  
 SFO2 300.1312005 MHz

F2 - Processing parameters  
 SI 32768  
 SF 75.4677490 MHz  
 WDW EM  
 SSB 0  
 LB 1.00 Hz  
 GB 0  
 PC 1.40

## 5-(2-bromophenyl)-3-methyl-1,3,4-oxadiazol-2(3H)-one (4f):

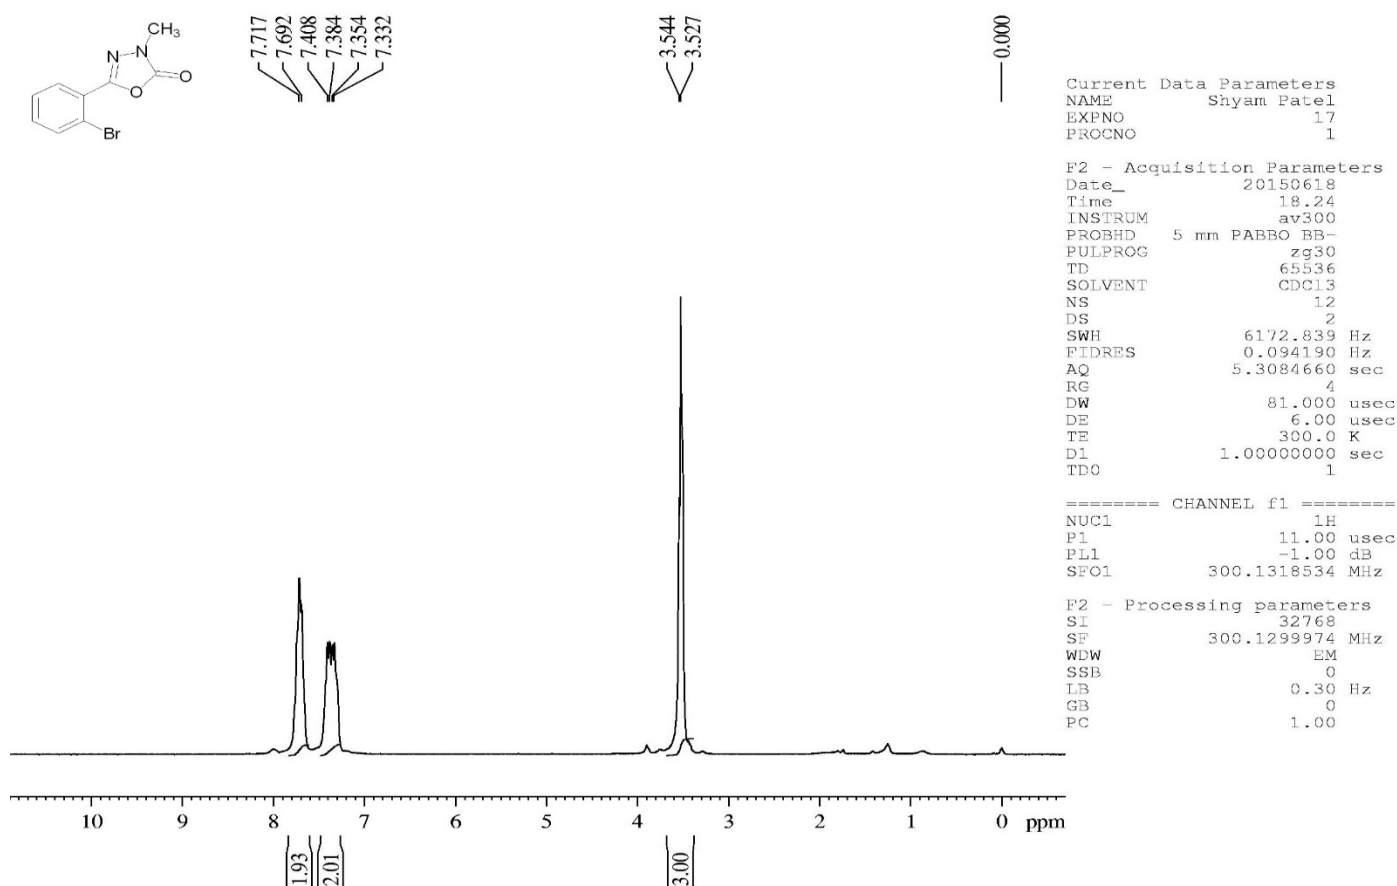

### 5-(2-bromophenyl)-3-methyl-1,3,4-oxadiazol-2(3H)-one (4f):

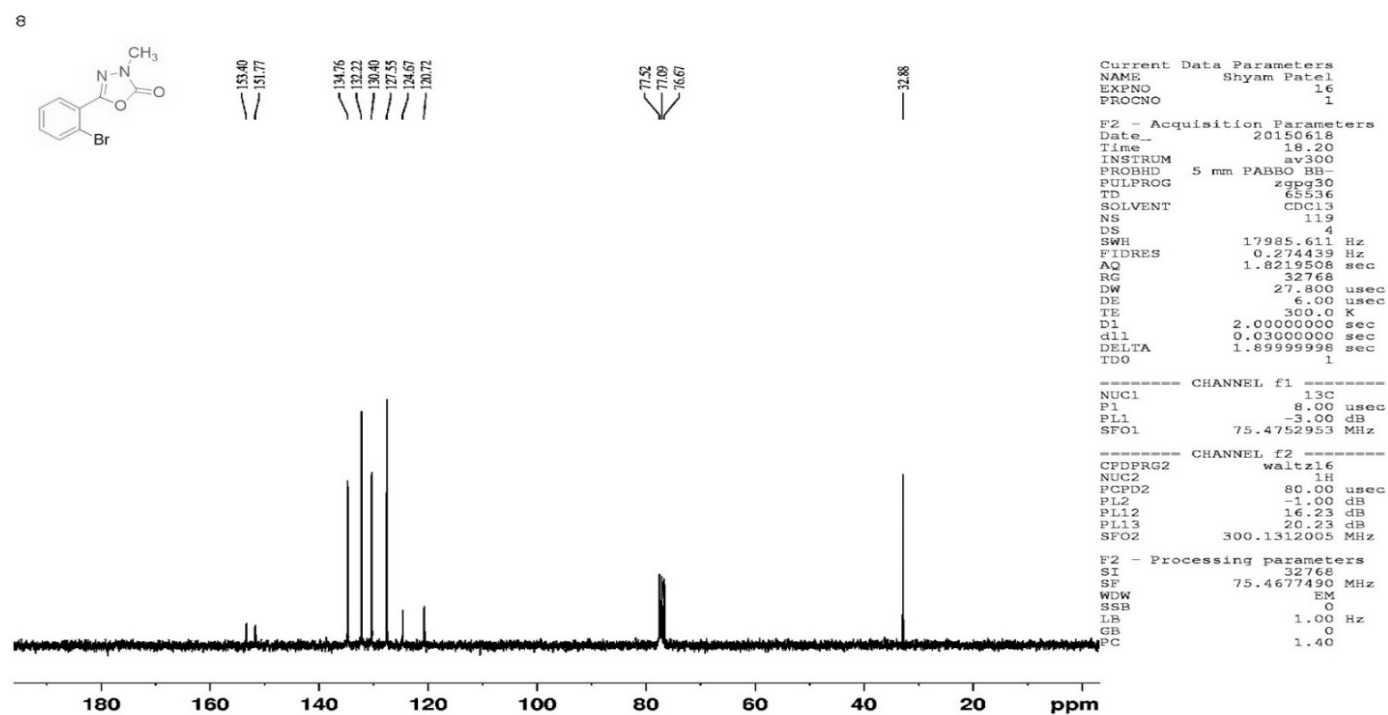

### 5-(4-fluorophenyl)-3-methyl-1,3,4-oxadiazol-2(3H)-one (4g):

5

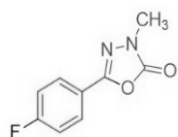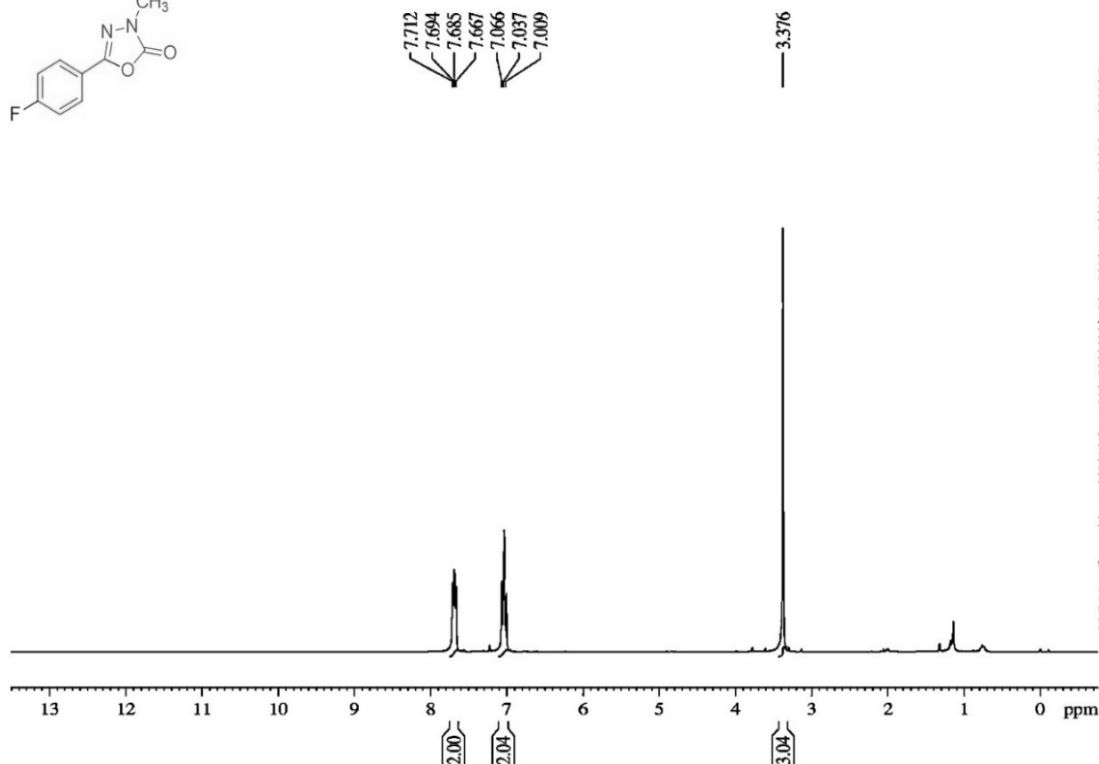

5-(4-fluorophenyl)-3-methyl-1,3,4-oxadiazol-2(3H)-one (4g):

5

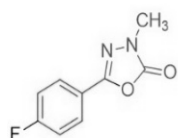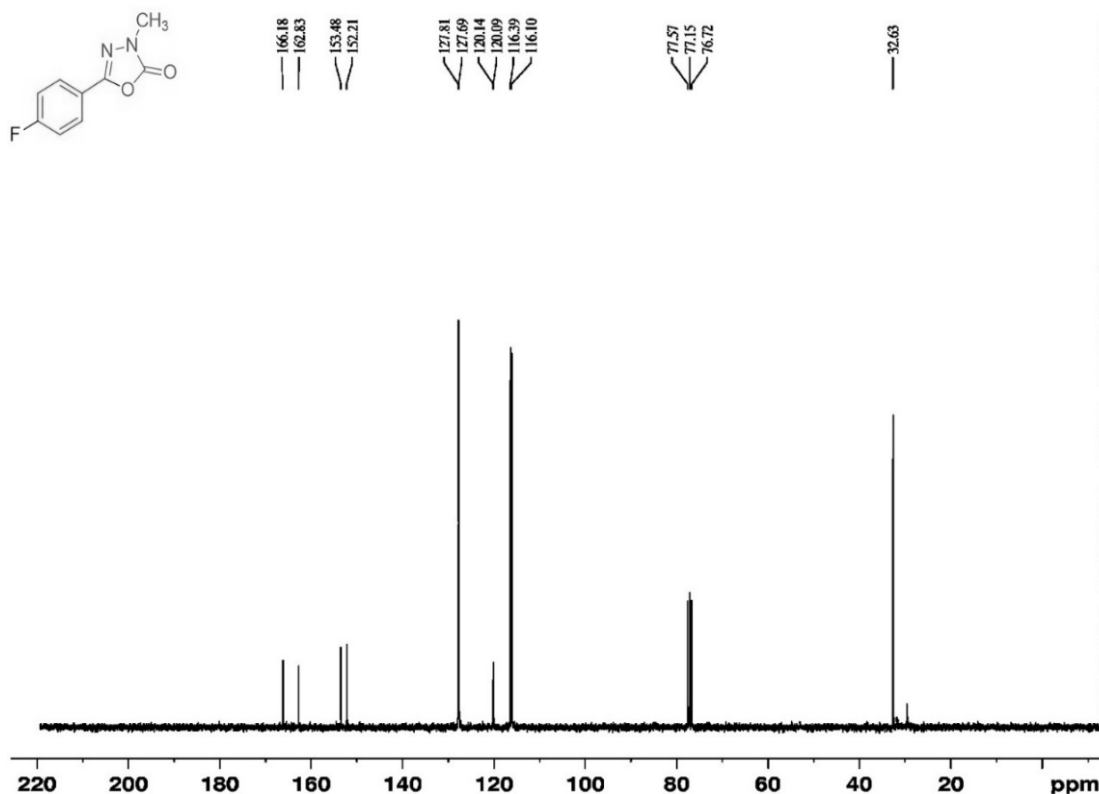

5-(2-fluorophenyl)-3-methyl-1,3,4-oxadiazol-2(3H)-one (4h):

12

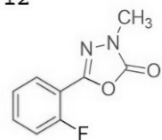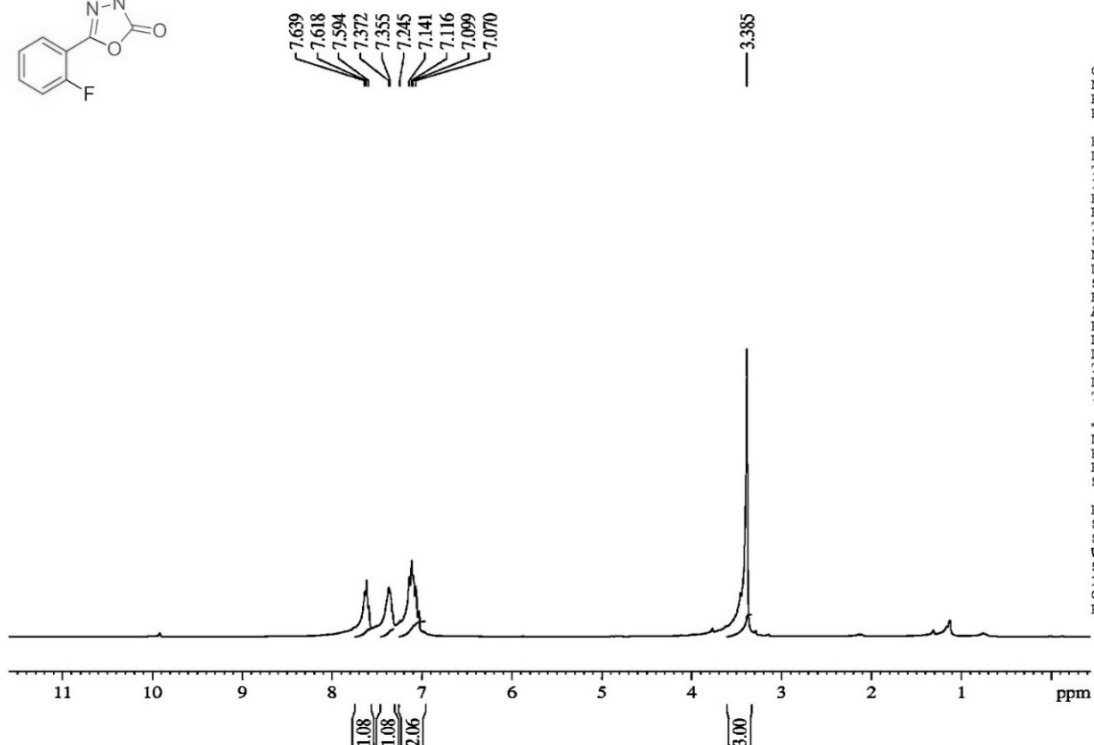

Current Data Parameters  
NAME Shyam Patel  
EXPNO 22  
PROCNO 1

F2 - Acquisition Parameters  
Date\_ 20150628  
Time 14.21  
INSTRUM av300  
PROBHD 5 mm PABBO BB-  
PULPROG zg30  
TD 65536  
SOLVENT CDCl3  
NS 16  
DS 2  
SWH 6172.839 Hz  
FIDRES 0.094190 Hz  
AQ 5.3084660 sec  
RG 35.9  
DW 81.000 usec  
DE 6.00 usec  
TE 300.0 K  
D1 1.00000000 sec  
TD0 1

----- CHANNEL f1 -----  
NUC1 1H  
P1 11.00 usec  
PL1 -1.00 dB  
SFO1 300.1318534 MHz

F2 - Processing parameters  
SI 32768  
SF 300.1300111 MHz  
WDW EM  
SSB 0  
LB 0.30 Hz  
GB 0  
PC 1.00

### 5-(2-fluorophenyl)-3-methyl-1,3,4-oxadiazol-2(3H)-one (4h):

12

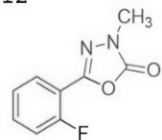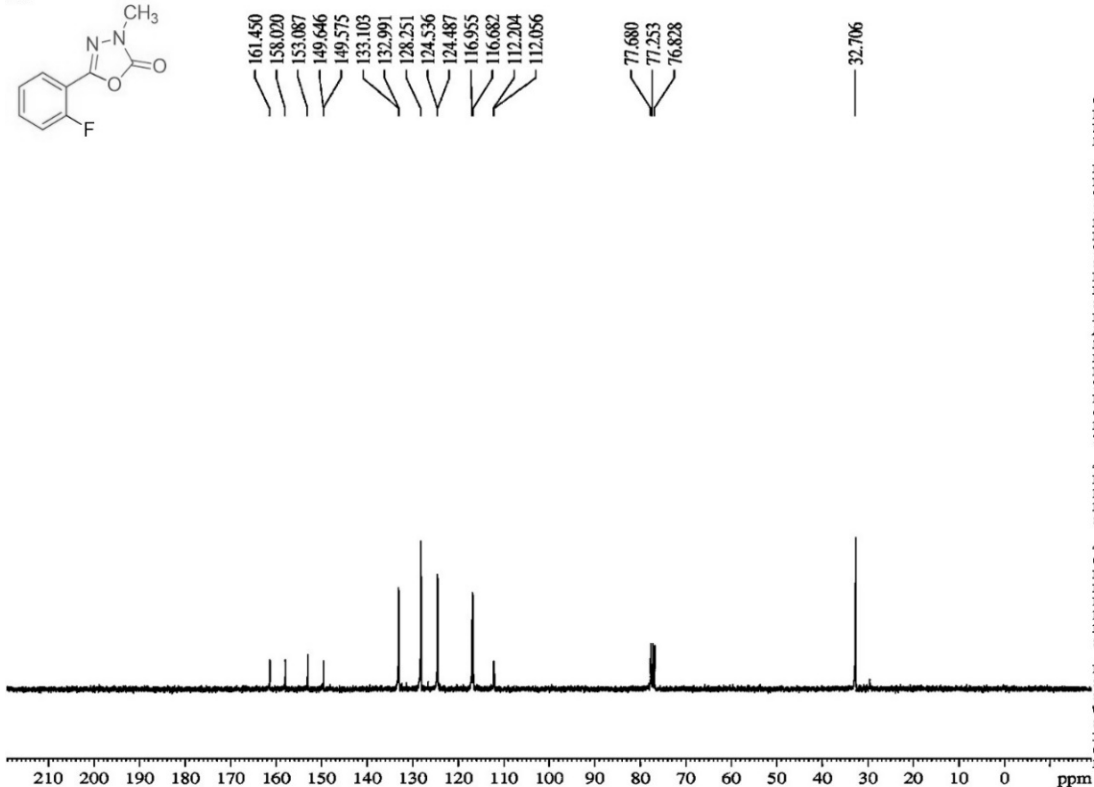

Current Data Parameters  
NAME Shyam Patel  
EXPNO 23  
PROCNO 1

F2 - Acquisition Parameters  
Date\_ 20150628  
Time 14.27  
INSTRUM av300  
PROBHD 5 mm PABBO BB-  
PULPROG zgpg30  
TD 65536  
SOLVENT CDCl3  
NS 103  
DS 4  
SWH 17985.611 Hz  
FIDRES 0.274439 Hz  
AQ 1.8219508 sec  
RG 32768  
DW 27.800 usec  
DE 6.00 usec  
TE 300.0 K  
D1 2.00000000 sec  
d11 0.03000000 sec  
DELTA 1.89999998 sec  
TD0 1

----- CHANNEL f1 -----  
NUC1 13C  
P1 8.00 usec  
PL1 -3.00 dB  
SFO1 75.4752953 MHz

----- CHANNEL f2 -----  
CPDPRG2 waltz16  
NUC2 1H  
PCPD2 80.00 usec  
PL2 -1.00 dB  
PL12 16.23 dB  
PL13 20.23 dB  
SFO2 300.1312005 MHz

F2 - Processing parameters  
SI 32768  
SF 75.4677490 MHz  
WDW EM  
SSB 0  
LB 1.00 Hz  
GB 0  
PC 1.40

### 5-(4-chlorophenyl)-3-methyl-1,3,4-oxadiazol-2(3H)-one (4i):

1 (2C1)

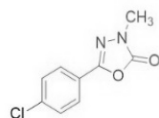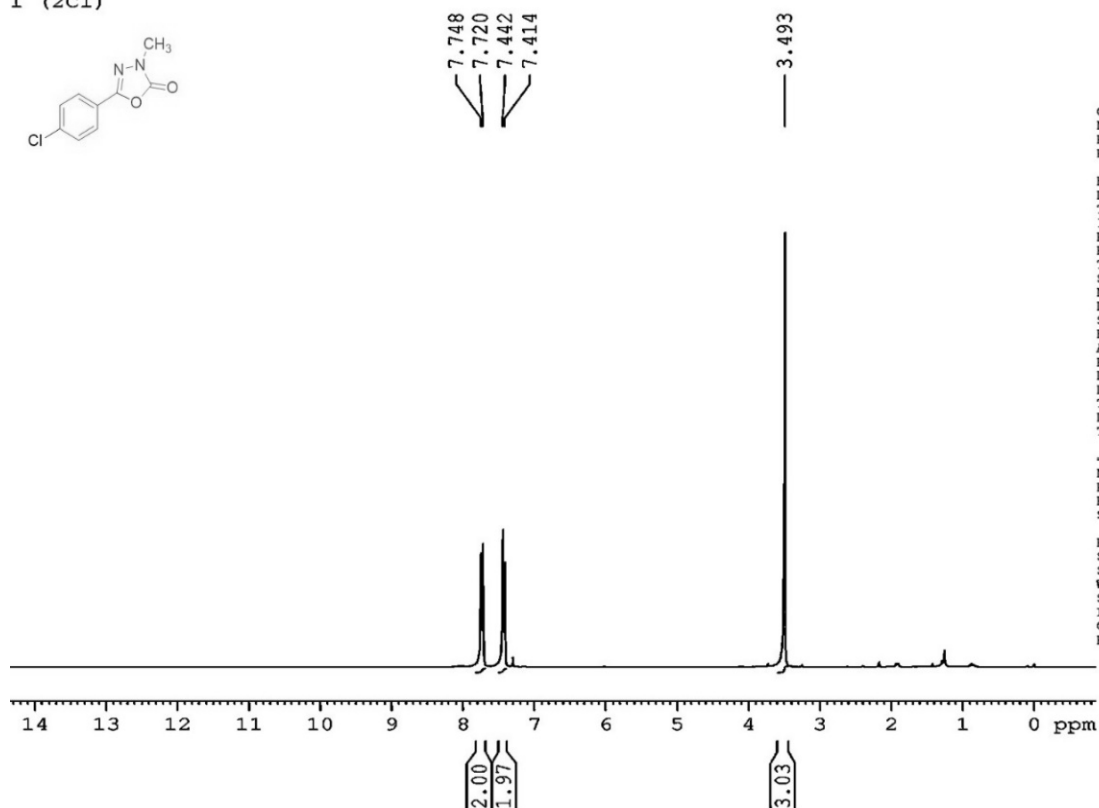

Current Data Parameters  
NAME Shyam Patel  
EXPNO 1  
PROCNO 1

F2 - Acquisition Parameters  
Date\_ 20150614  
Time 13.37  
INSTRUM av300  
PROBHD 5 mm PABBO BB-  
PULPROG zg30  
TD 65536  
SOLVENT CDCl3  
NS 16  
DS 2  
SWH 6172.839 Hz  
FIDRES 0.094190 Hz  
AQ 5.3084660 sec  
RG 57  
DW 81.000 usec  
DE 6.00 usec  
TE 300.0 K  
D1 1.00000000 sec  
TD0 1

----- CHANNEL f1 -----  
NUC1 1H  
P1 11.00 usec  
PL1 -1.00 dB  
SFO1 300.1318534 MHz

F2 - Processing parameters  
SI 32768  
SF 300.1299948 MHz  
WDW EM  
SSB 0  
LB 0.30 Hz  
GB 0  
PC 1.00

5-(4-chlorophenyl)-3-methyl-1,3,4-oxadiazol-2(3H)-one (4i):

3 (4c1)

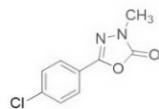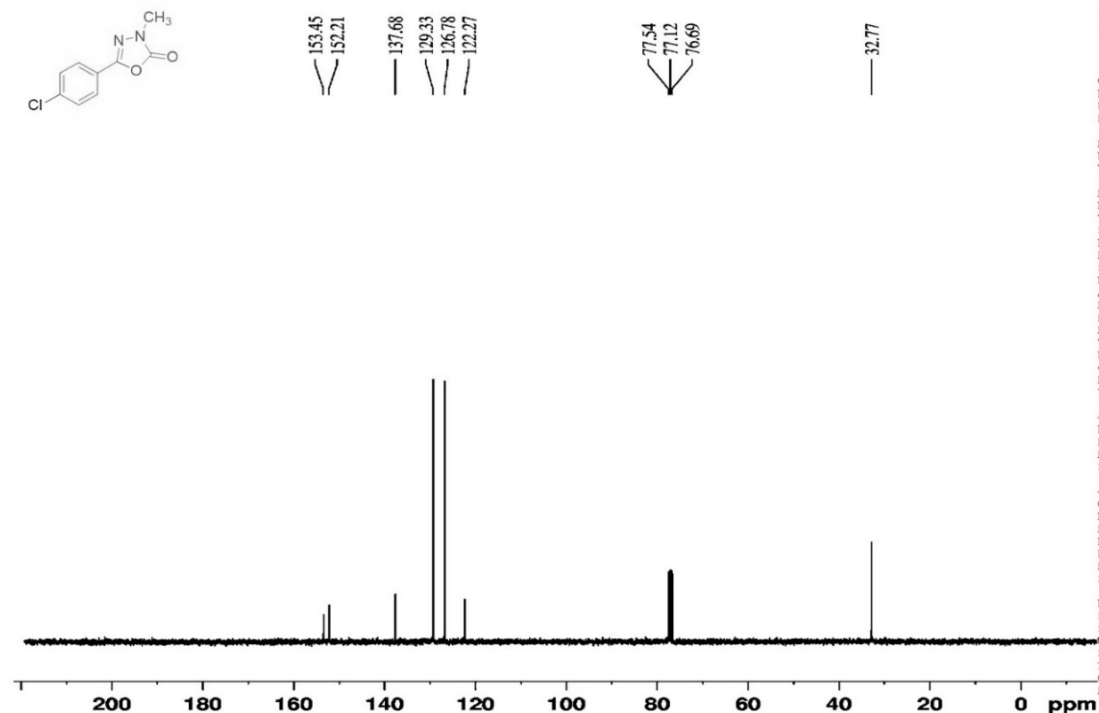

**BRUKER**

Current Data Parameters  
NAME Shyam Patel  
EXPNO 2  
PROCNO 1

F2 - Acquisition Parameters  
Date\_ 20150614  
Time 13.40  
INSTRUM av300  
PROBHD 5 mm PABBO BB-  
PULPROG zgpg30  
TD 65536  
SOLVENT CDCl3  
NS 65  
DS 4  
SWH 17985.611 Hz  
FIDRES 0.274439 Hz  
AQ 1.8219508 sec  
RG 32768  
DW 27.800 usec  
DE 6.00 usec  
TE 300.0 K  
D1 2.00000000 sec  
d11 0.03000000 sec  
DELTA 1.89999998 sec  
TD0 1

----- CHANNEL f1 -----  
NUC1 13C  
P1 8.00 usec  
PL1 -3.00 dB  
SFO1 75.4752953 MHz

----- CHANNEL f2 -----  
CPDPRG2 waltz16  
NUC2 1H  
PCPD2 80.00 usec  
PL2 -1.00 dB  
PL12 16.23 dB  
PL13 20.23 dB  
SFO2 300.1312005 MHz

F2 - Processing parameters  
SI 32768  
SF 75.4677490 MHz  
WDW EM  
SSB 0  
LB 1.00 Hz  
GB 0  
PC 1.40

5-(3-chlorophenyl)-3-methyl-1,3,4-oxadiazol-2(3H)-one (4j):



2 (3Cl)

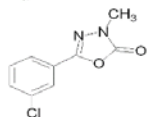

7.750  
7.669  
7.646  
7.429  
7.405  
7.380

3.494

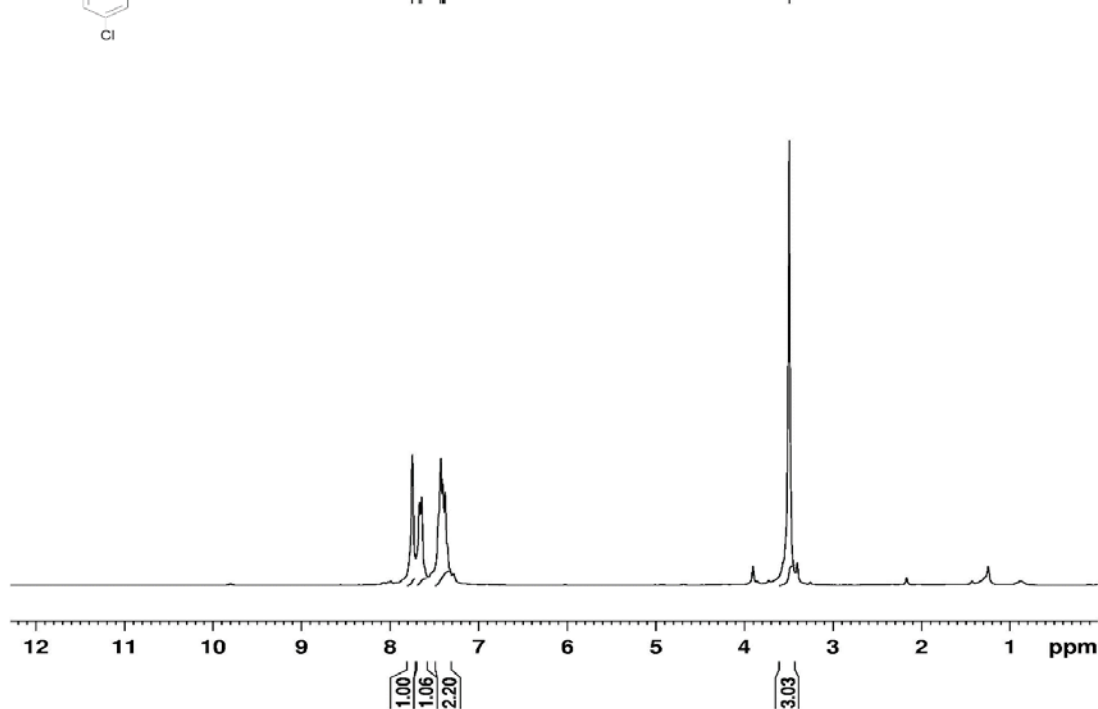

Current Data Parameters  
NAME Shyam Patel  
EXPNO 3  
PROCNO 1

F2 - Acquisition Parameters  
Date\_ 20150614  
Time 13.53  
INSTRUM av300  
PROBHD 5 mm PABBO BB-  
PULPROG zg30  
TD 65536  
SOLVENT CDCl3  
NS 16  
DS 4  
SWH 6172.835  
FIDRES 0.094190  
AQ 5.3084660  
RG 40.2  
DW 81.000  
DE 6.00  
TE 300.0  
D1 1.0000000  
TDO 1

===== CHANNEL f1 =====  
NUC1 1H  
P1 11.00  
PL1 -1.00  
SFO1 300.1318534

F2 - Processing parameters  
SI 32768  
SF 300.1299891  
WDW EM  
SSB 0  
LB 0.30  
GB 0  
PC 1.00

## 5-(3-chlorophenyl)-3-methyl-1,3,4-oxadiazol-2(3H)-one (4j):

2 (3 Cl)

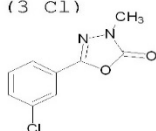

153.33  
151.75

135.07  
131.45  
130.30  
129.33  
125.42  
123.54

77.61  
77.19  
76.76

32.78

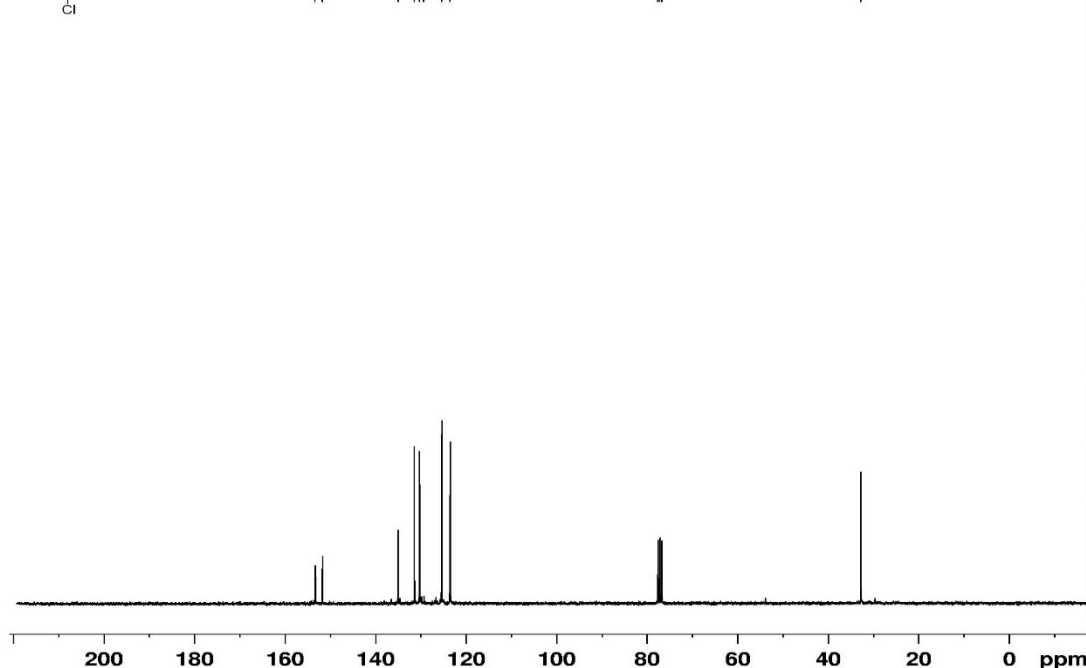

Current Data Parameters  
NAME Shyam Patel  
EXPNO 4  
PROCNO 1

F2 - Acquisition Parameters  
Date\_ 20150614  
Time 14.01  
INSTRUM av300  
PROBHD 5 mm PABBO BB-  
PULPROG zgpg30  
TD 65536  
SOLVENT CDCl3  
NS 252  
DS 4  
SWH 17985.611 Hz  
FIDRES 0.274439 Hz  
AQ 1.8219508 sec  
RG 32768  
DW 27.800 usec  
DE 6.00 usec  
TE 300.0 K  
D1 2.0000000 sec  
d11 0.0300000 sec  
DELTA 1.8999998 sec  
TDC 1

===== CHANNEL f1 =====  
NUC1 13C  
P1 8.00 usec  
PL1 -3.00 dB  
SFO1 75.4752953 MHz

===== CHANNEL f2 =====  
CPDPRG2 waltz16  
NUC2 1H  
PCPD2 80.00 usec  
PL2 -1.00 dB  
PL12 16.23 dB  
PL13 20.23 dB  
SFO2 300.1312005 MHz

F2 - Processing parameters  
SI 32768  
SF 75.4677490 MHz  
WDW FM  
SSB 0  
LB 1.00 Hz  
GB 0  
PC 1.40

## 5-(2-chlorophenyl)-3-methyl-1,3,4-oxadiazol-2(3H)-one (4k):

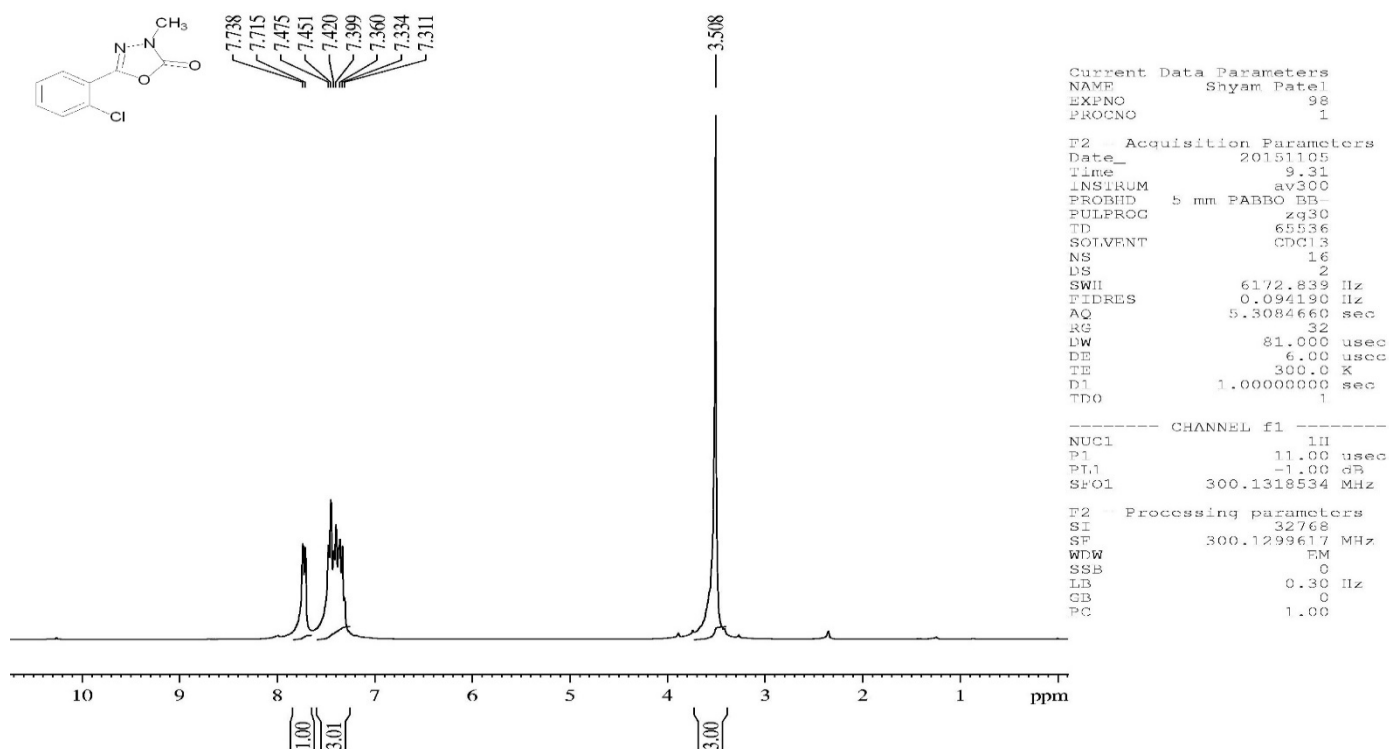

### 5-(2-chlorophenyl)-3-methyl-1,3,4-oxadiazol-2(3H)-one (4k):

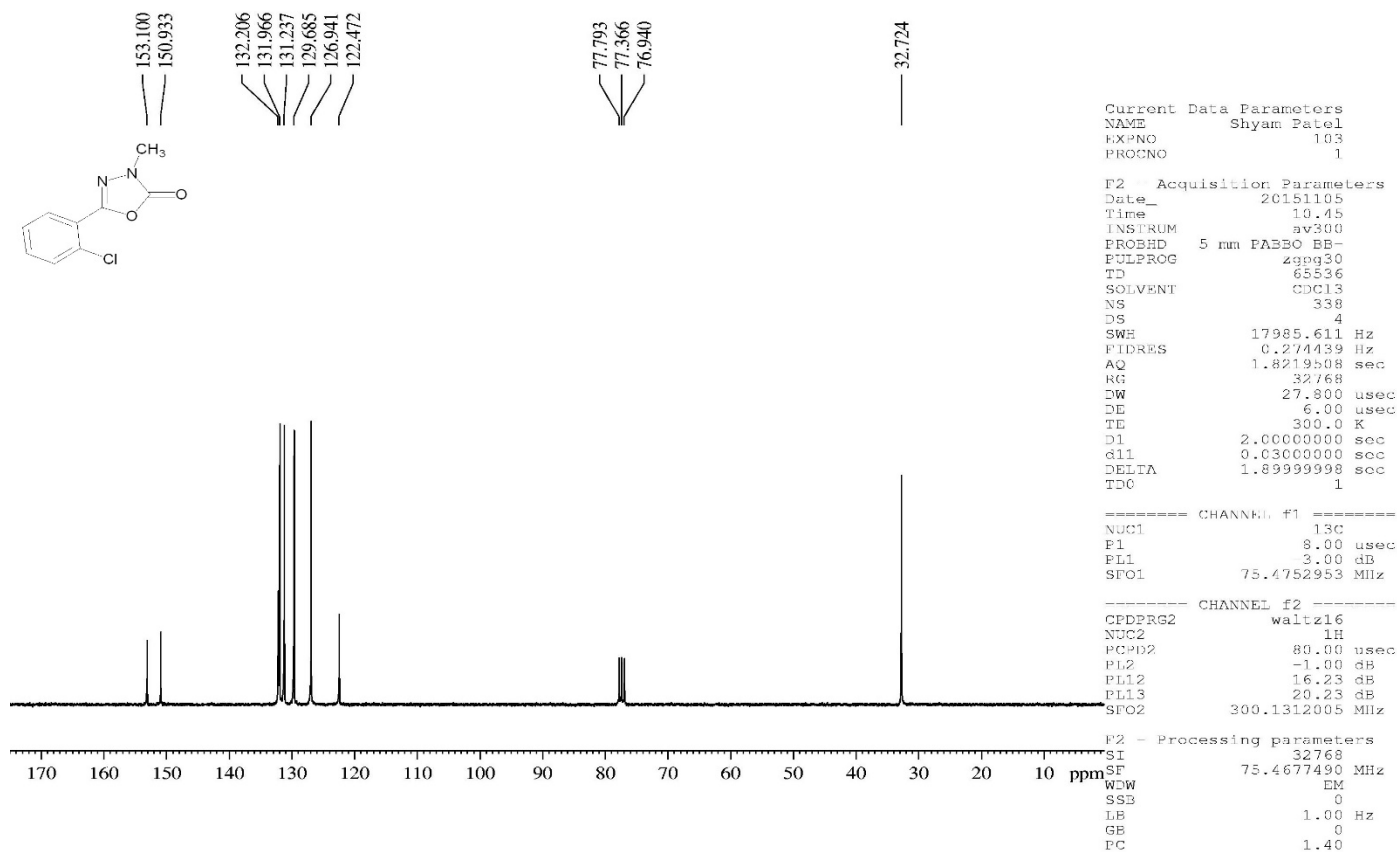

## 5-(3,4-dimethoxyphenyl)-3-methyl-1,3,4-oxadiazol-2(3H)-one (4l):

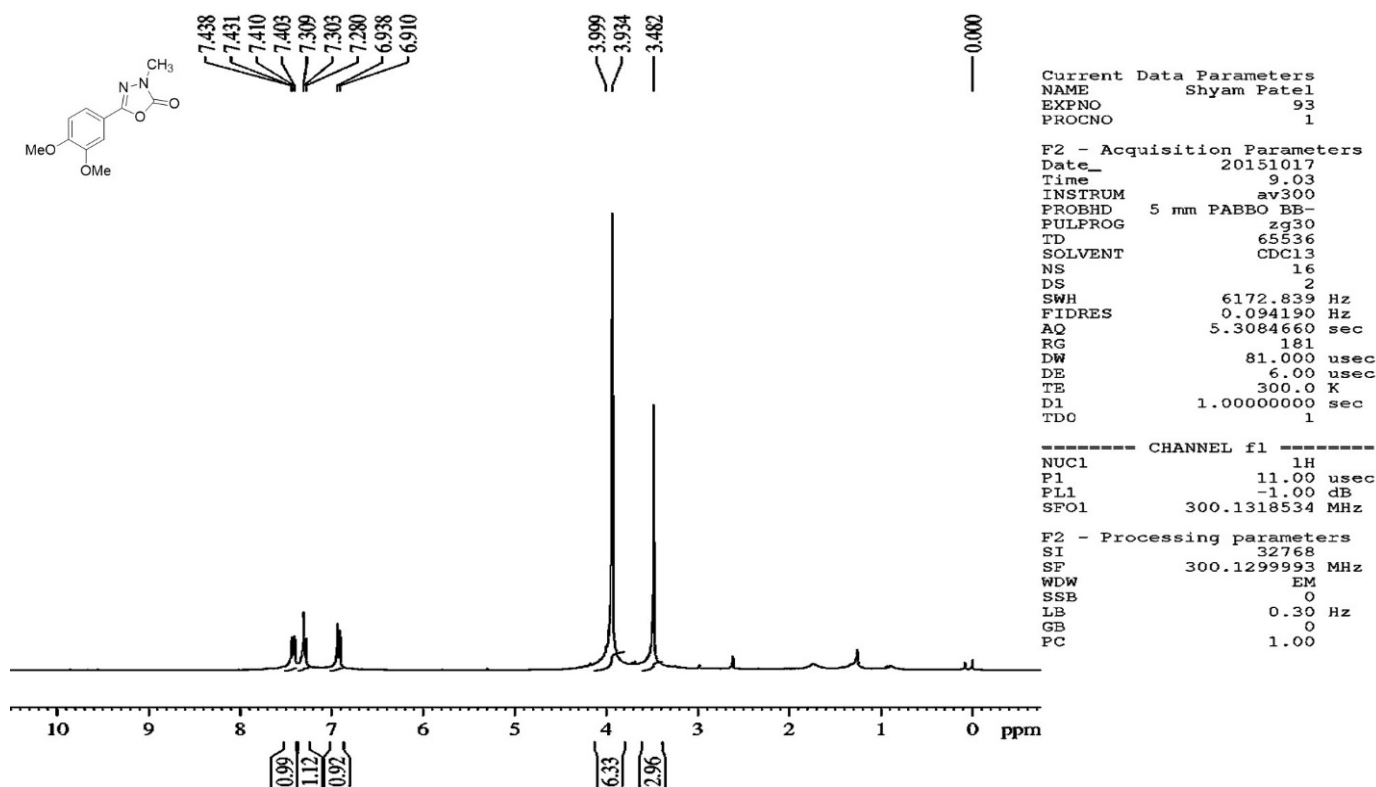

## 5-(3,4-dimethoxyphenyl)-3-methyl-1,3,4-oxadiazol-2(3H)-one (4l):

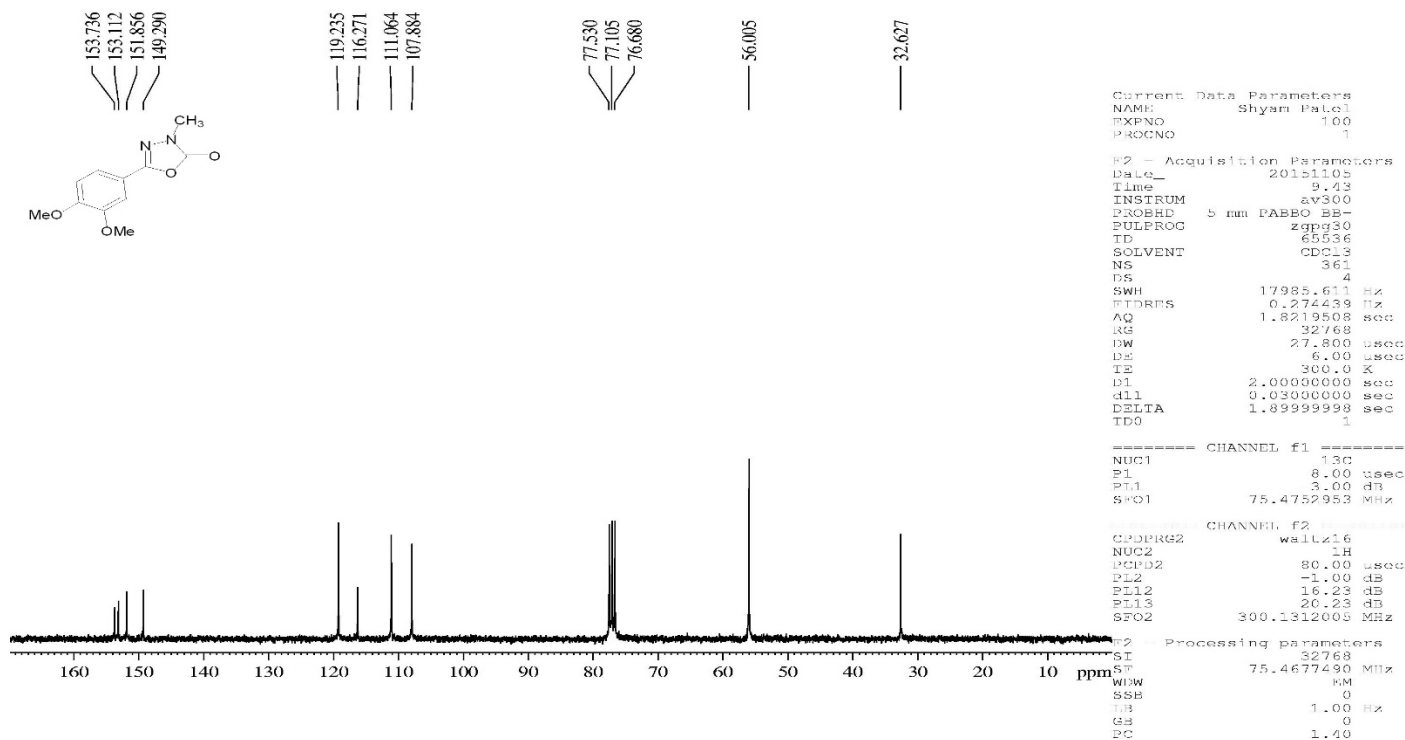

## 3-methyl-5-(3,4,5-trimethoxyphenyl)-1,3,4-oxadiazol-2(3H)-one (4m):

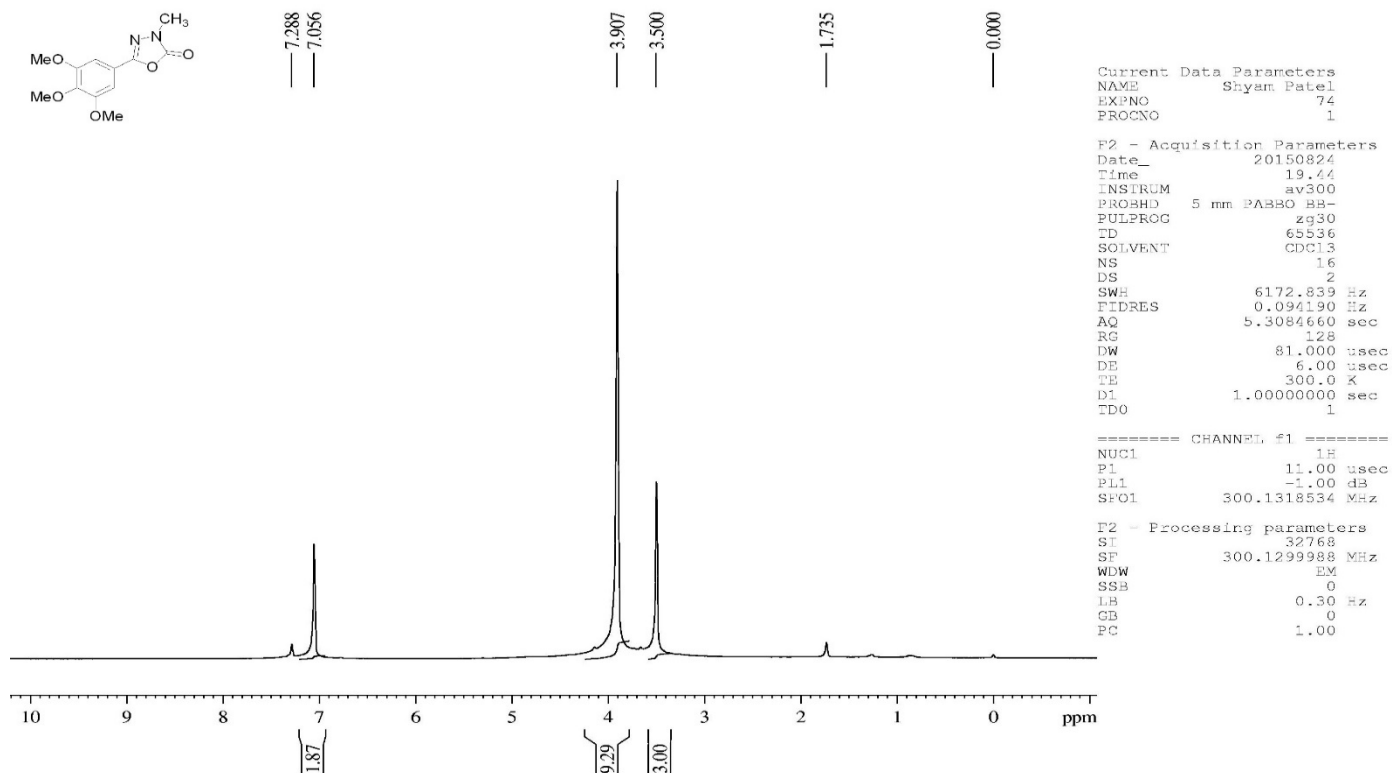

### 3-methyl-5-(3,4,5-trimethoxyphenyl)-1,3,4-oxadiazol-2(3H)-one (4m):

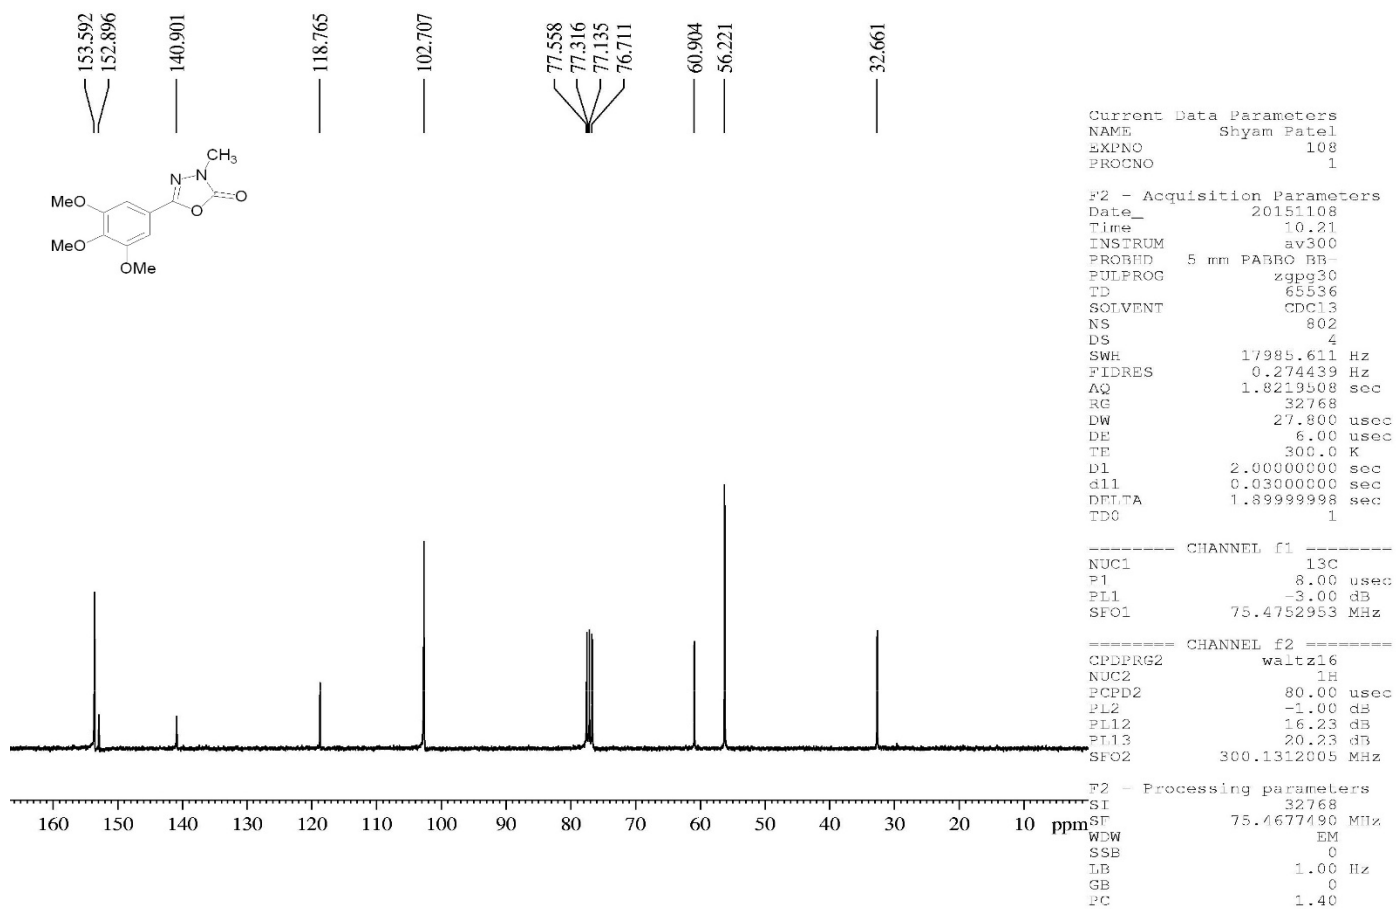

## 3-methyl-5-(3-nitrophenyl)-1,3,4-oxadiazol-2(3H)-one (4n):

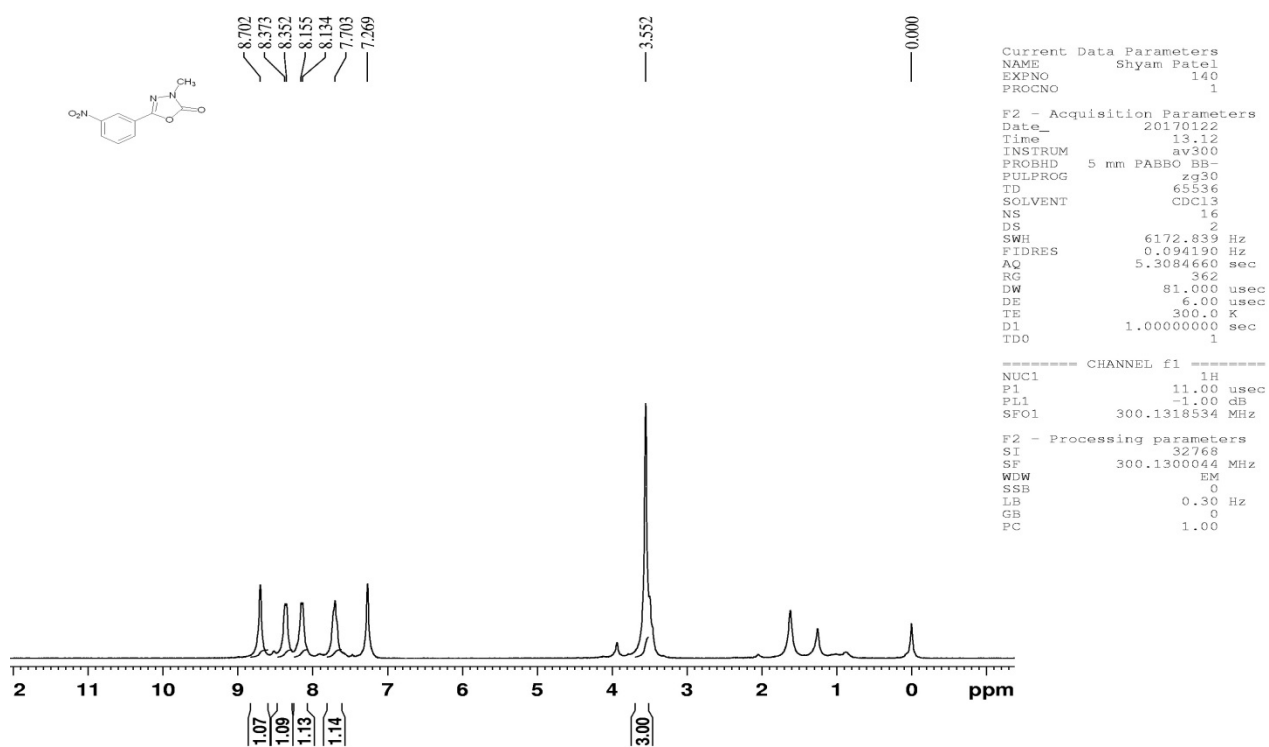

## 3-methyl-5-(3-nitrophenyl)-1,3,4-oxadiazol-2(3H)-one (4n):

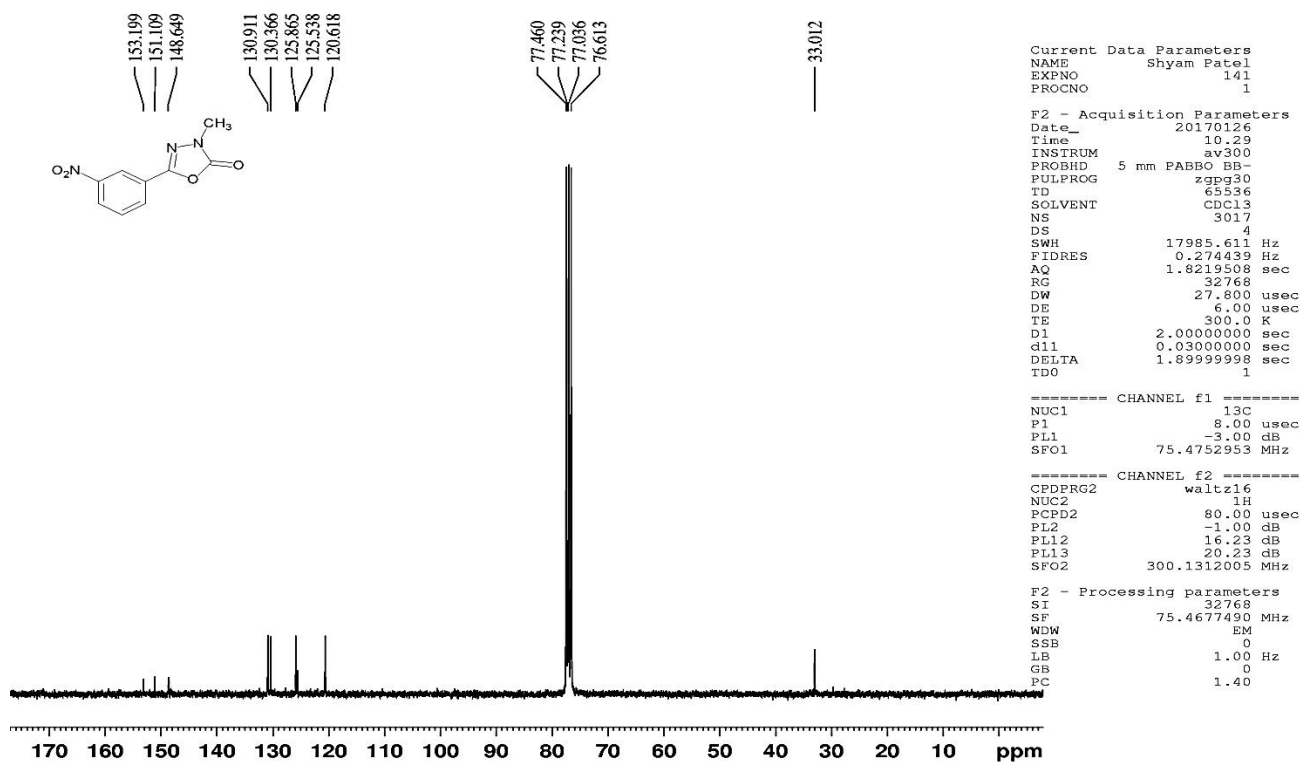

**Methyl 4-(4-methyl-5-oxo-4,5-dihydro-1,3,4-oxadiazol-2-yl) benzoate(4o):**
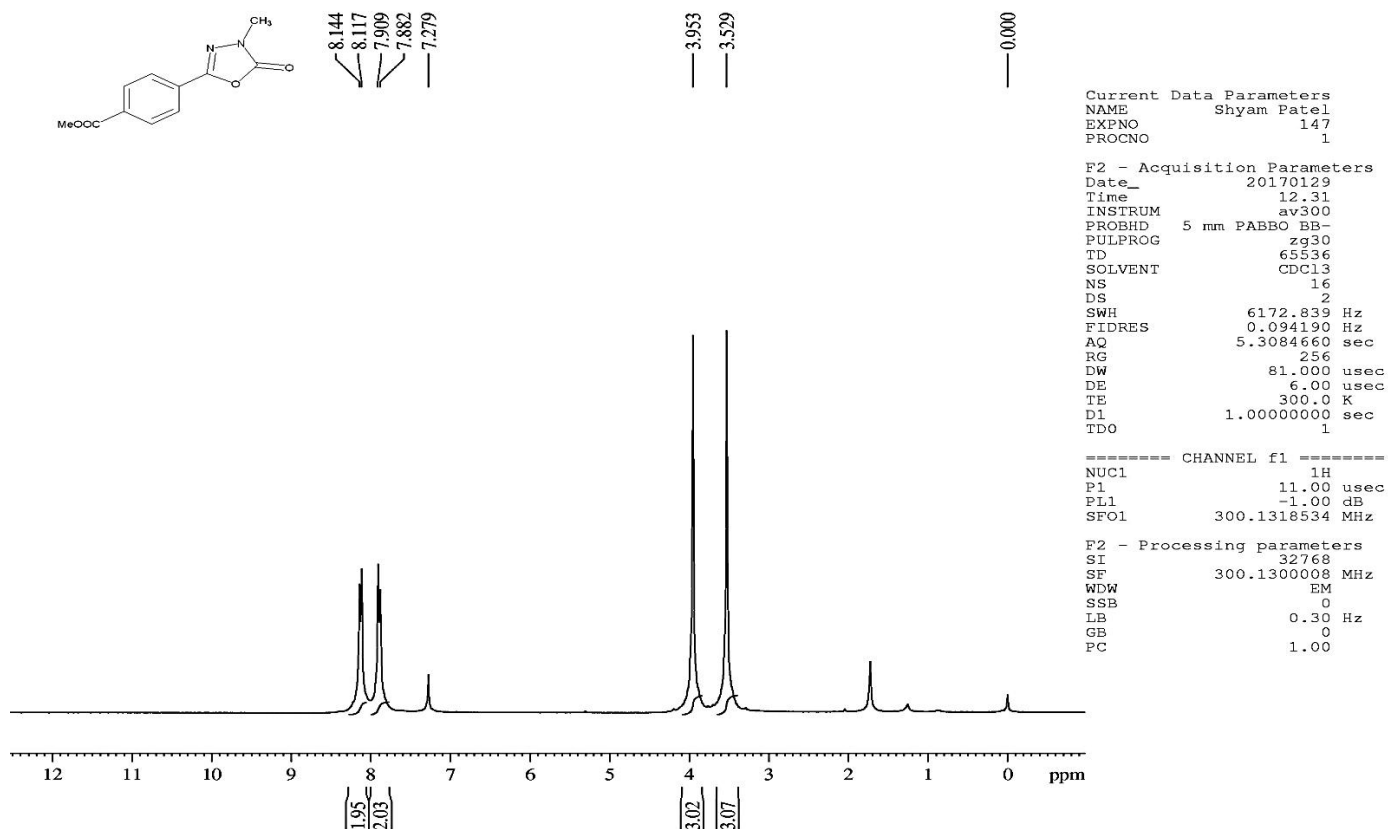
**Methyl 4-(4-methyl-5-oxo-4,5-dihydro-1,3,4-oxadiazol-2-yl) benzoate(4o):**
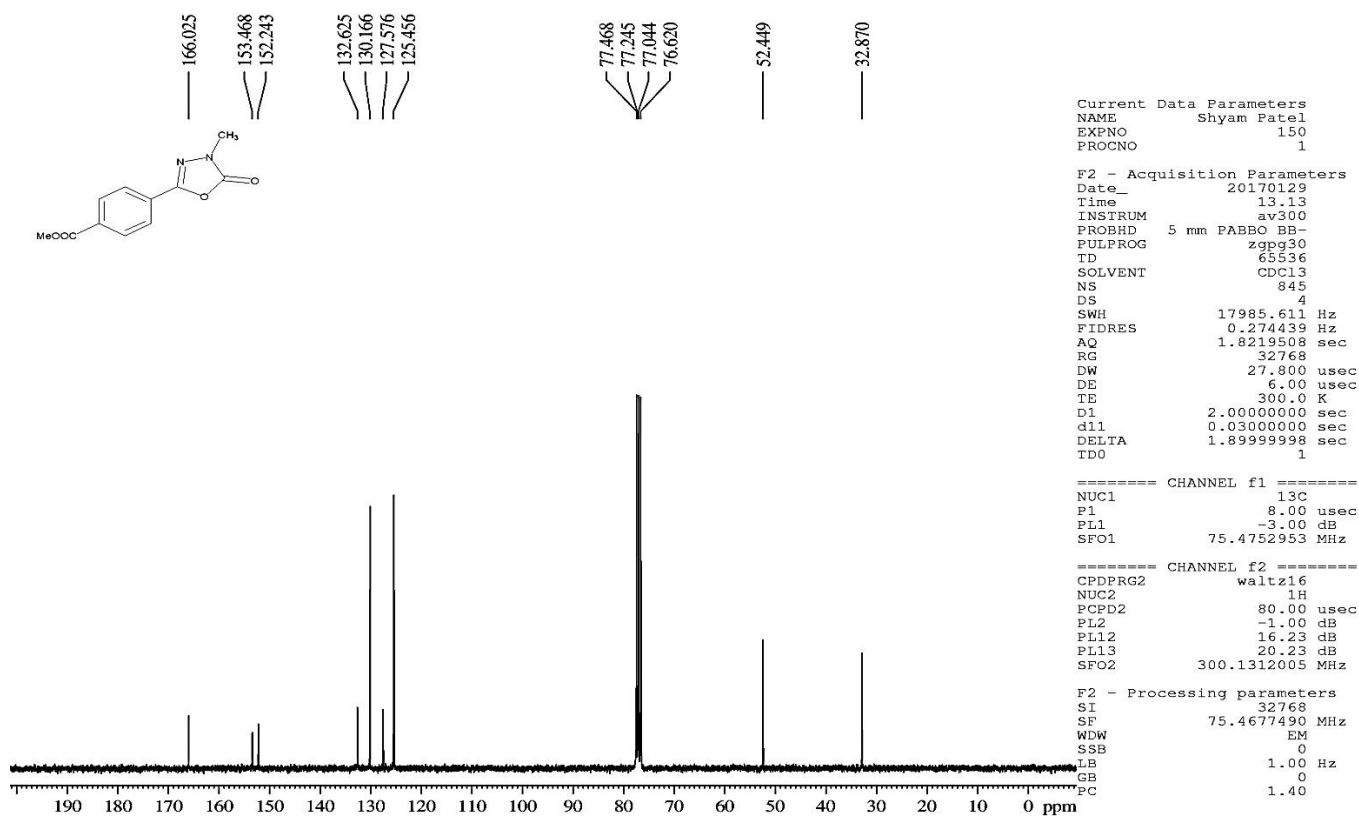

## 3-methyl-5-(naphthalen-2-yl)-1,3,4-oxadiazol-2(3H)-one (4p):

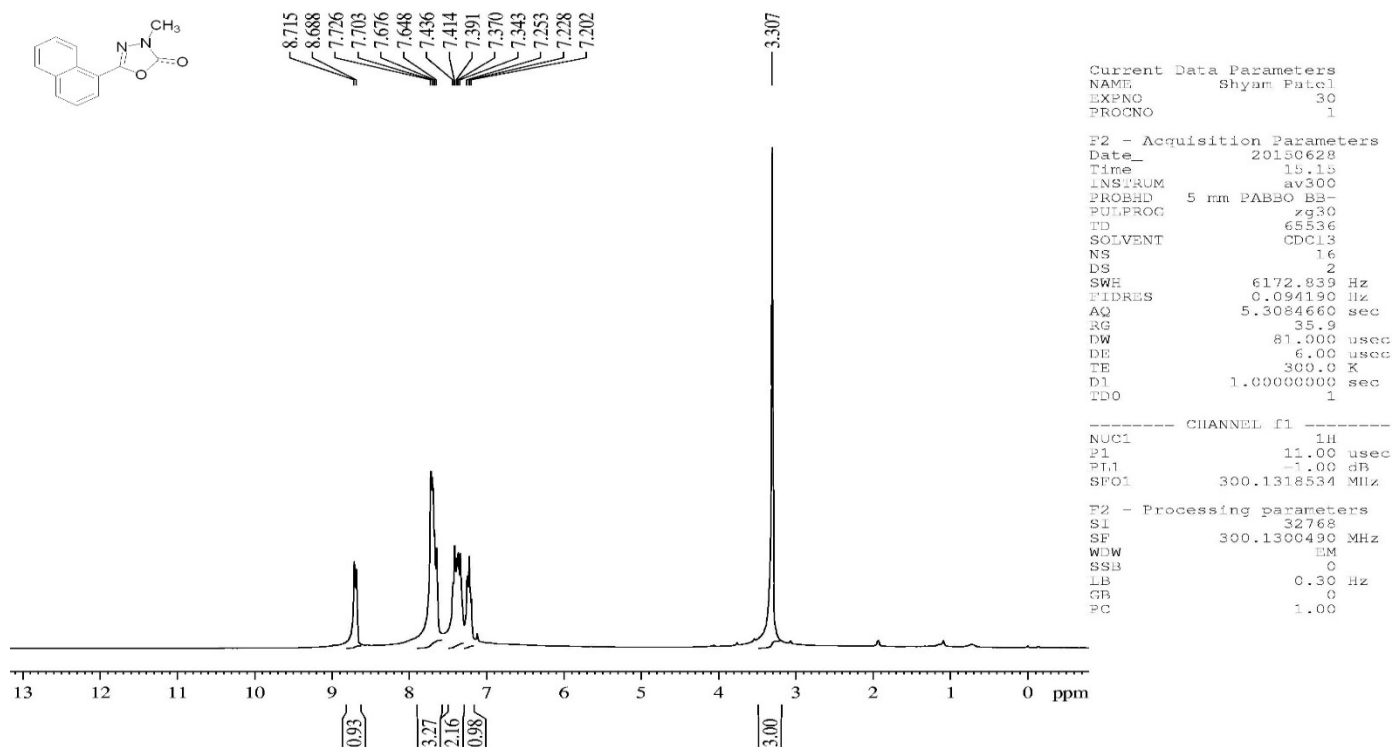

## 3-methyl-5-(naphthalen-2-yl)-1,3,4-oxadiazol-2(3H)-one (4p):

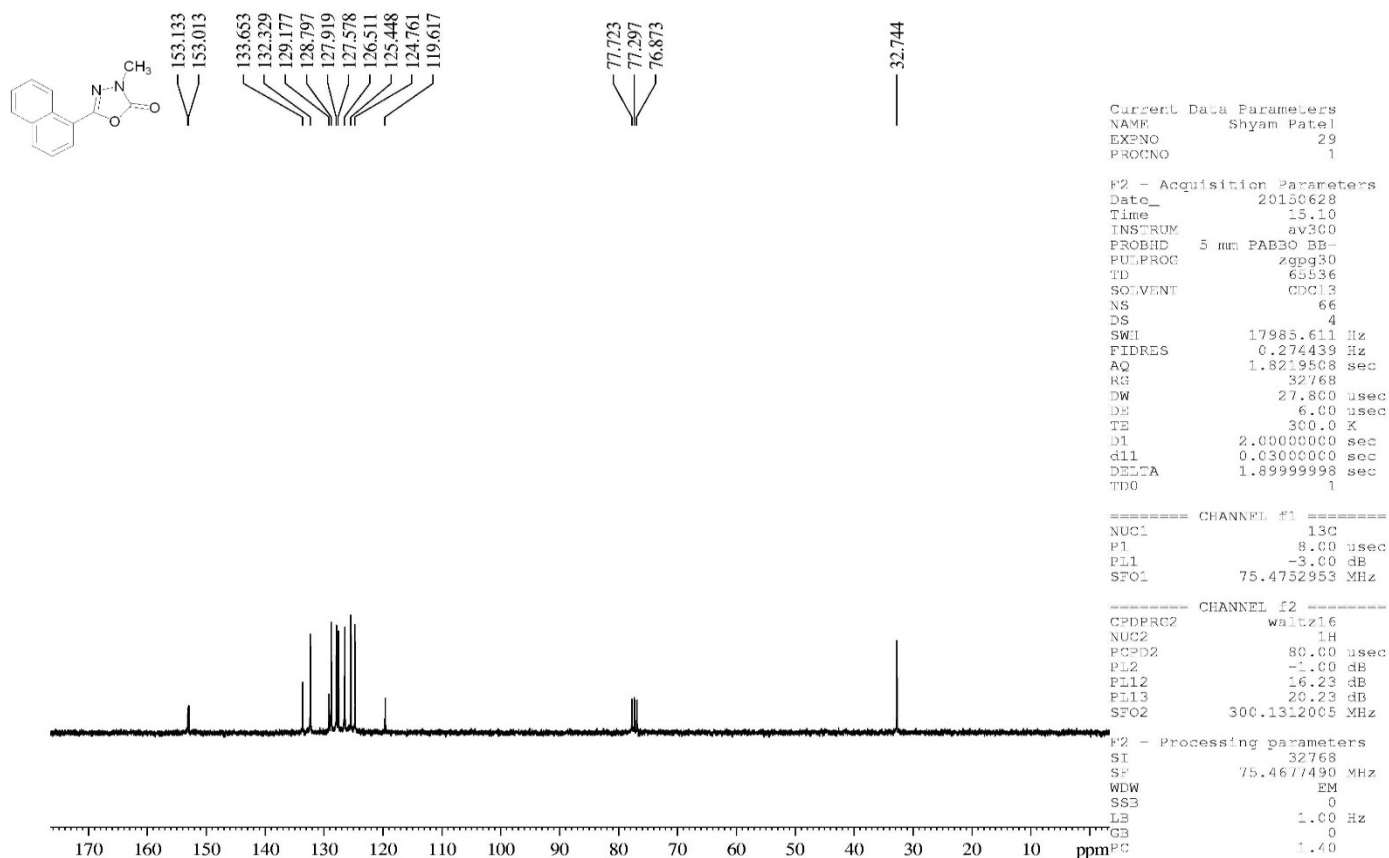

## 3-methyl-5-(pyridin-3-yl)-1,3,4-oxadiazol-2(3H)-one (4q):

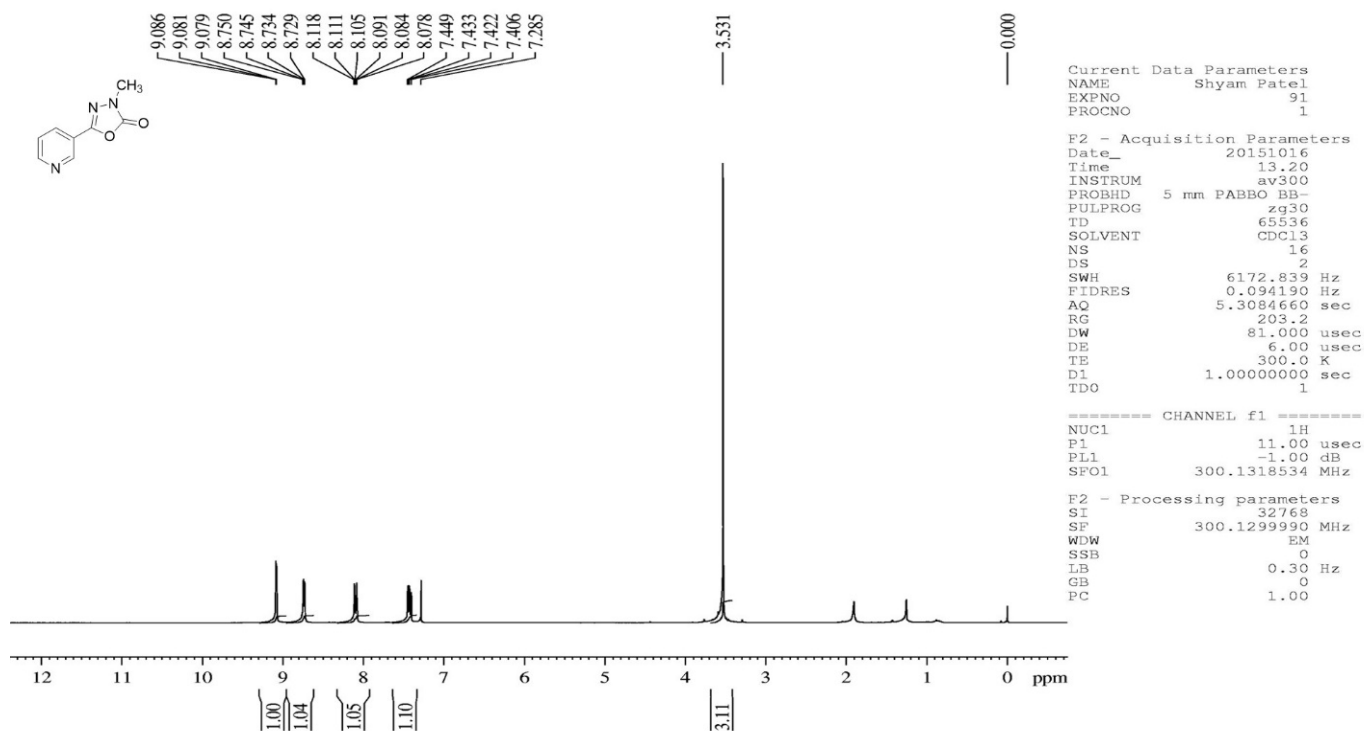

## 3-methyl-5-(pyridin-3-yl)-1,3,4-oxadiazol-2(3H)-one (4q):

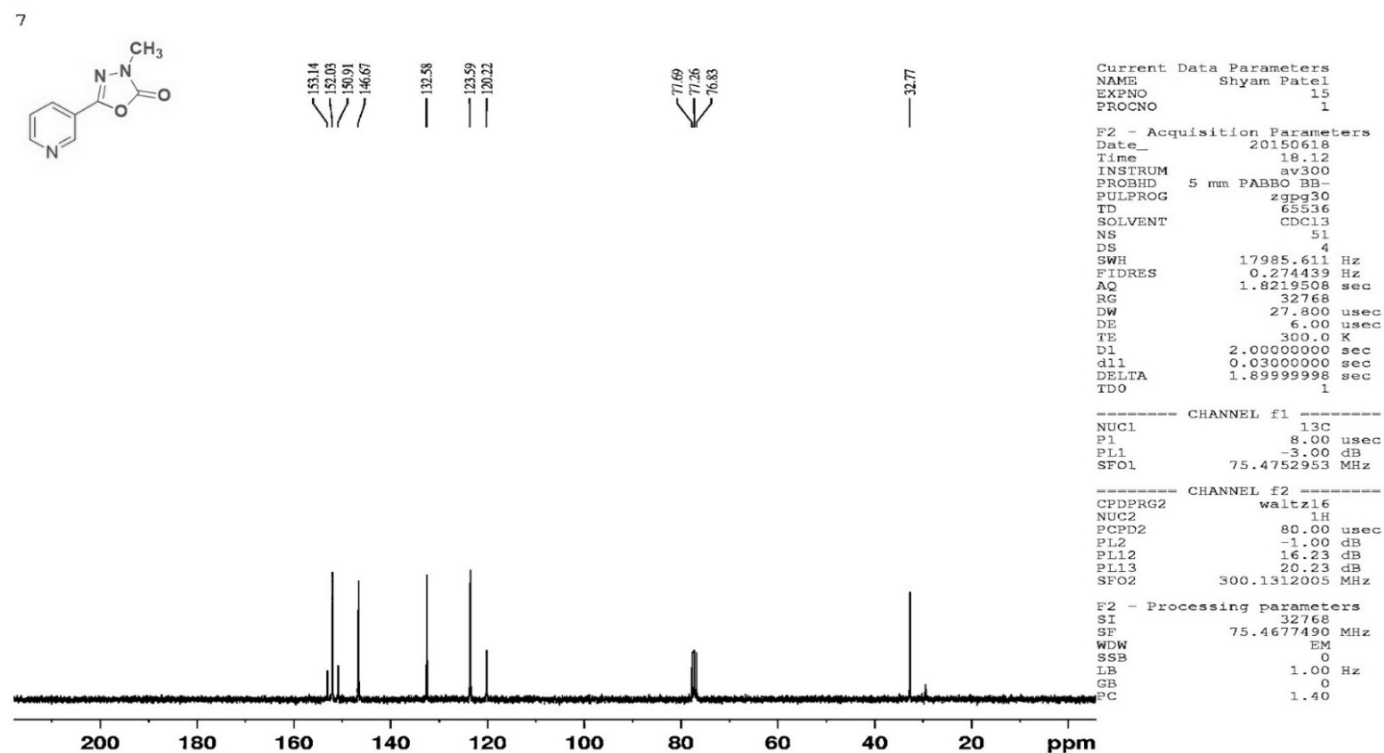



## 5-(furan-2-yl)-3-methyl-1,3,4-oxadiazol-2(3H)-one (4r):

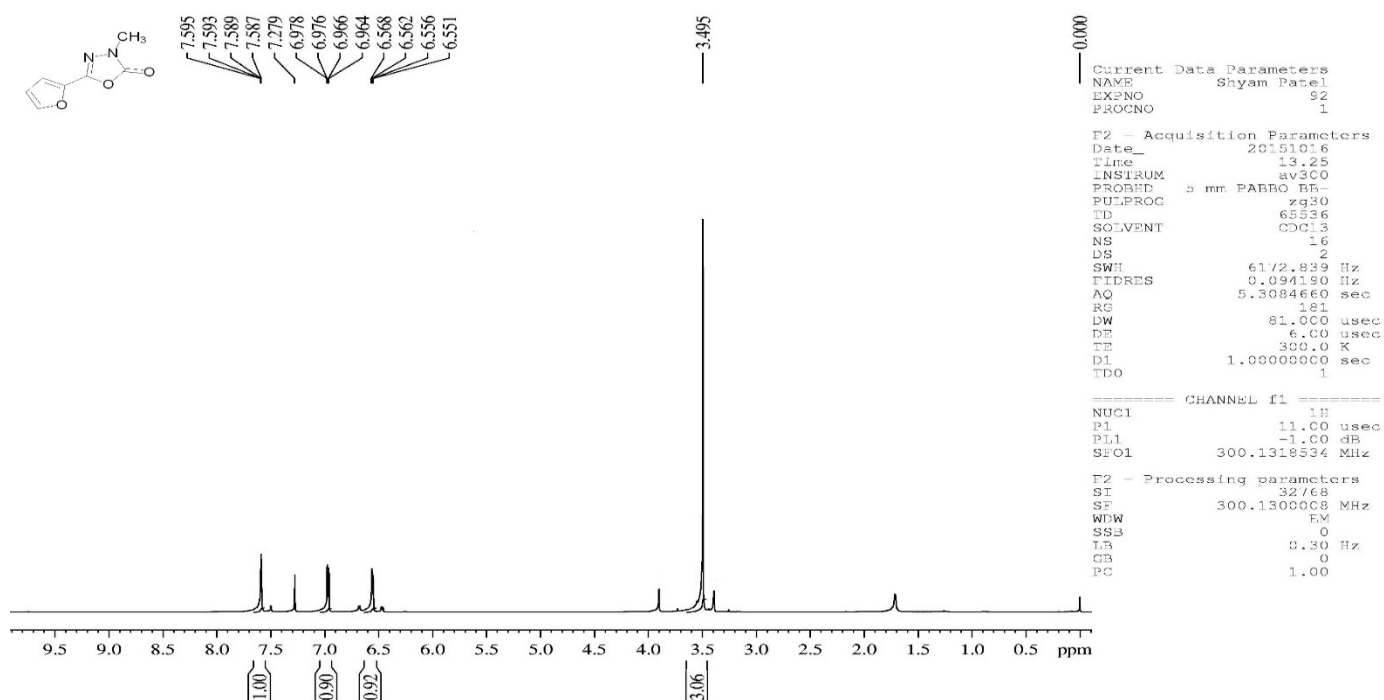

## 5-(furan-2-yl)-3-methyl-1,3,4-oxadiazol-2(3H)-one (4r):

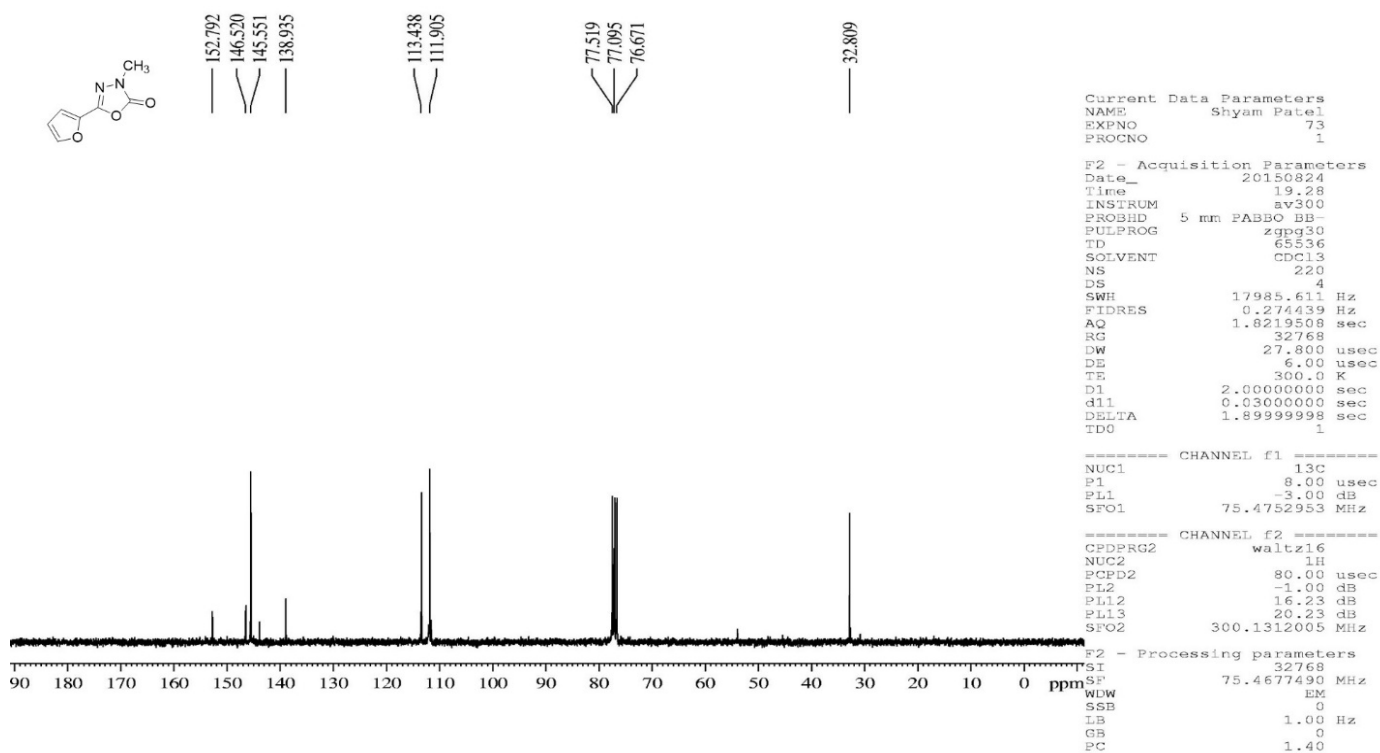

## 5-(1H-indol-2-yl)-3-methyl-1,3,4-oxadiazol-2(3H)-one (4s):

15 (indole)

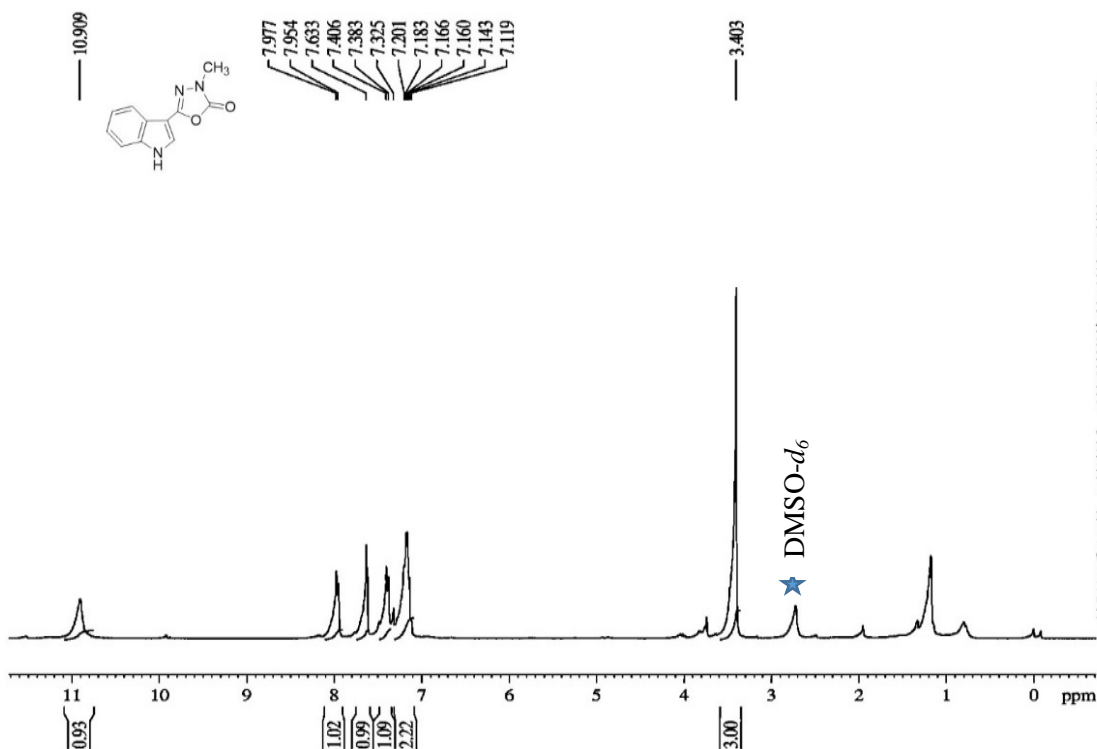

Current Data Parameters  
 NAME Shyam Patel  
 EXPNO 45  
 PROCNO 1

F2 - Acquisition Parameters  
 Date\_ 20150628  
 Time 17.24  
 INSTRUM av300  
 PROBHD 5 mm PABBO BB-  
 PULPROG zg30  
 TD 65536  
 SOLVENT CDC13  
 NS 16  
 DS 2  
 SWH 6172.839 Hz  
 FIDRES 0.094190 Hz  
 AQ 5.3084660 sec  
 RG 128  
 DW 81.000 usec  
 DE 6.00 usec  
 TE 300.0 K  
 D1 1.00000000 sec  
 TD0 1

----- CHANNEL f1 -----  
 NUC1 1H  
 P1 11.00 usec  
 PL1 -1.00 dB  
 SFO1 300.1318534 MHz

F2 - Processing parameters  
 SI 32768  
 SF 300.1299868 MHz  
 WDW EM  
 SSB 0  
 LB 0.30 Hz  
 GB 0  
 PC 1.00

## 5-(1H-indol-2-yl)-3-methyl-1,3,4-oxadiazol-2(3H)-one (4s):

15 (indole)

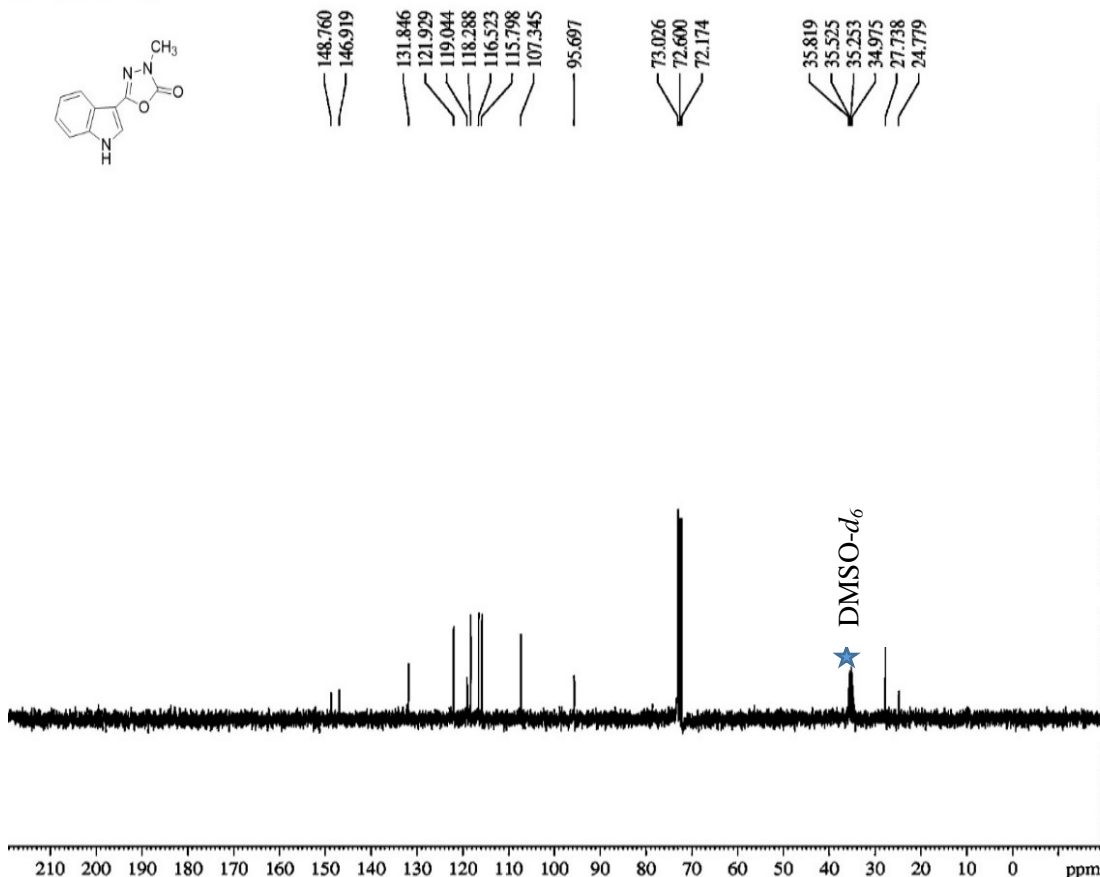

Current Data Parameters  
 NAME Shyam Patel  
 EXPNO 47  
 PROCNO 1

F2 - Acquisition Parameters  
 Date\_ 20150628  
 Time 17.35  
 INSTRUM av300  
 PROBHD 5 mm PABBO BB-  
 PULPROG zgpg30  
 TD 65536  
 SOLVENT DMSO  
 NS 148  
 DS 4  
 SWH 17985.611 Hz  
 FIDRES 0.274439 Hz  
 AQ 1.8219508 sec  
 RG 32768  
 DW 27.800 usec  
 DE 6.00 usec  
 TE 300.0 K  
 D1 2.00000000 sec  
 d11 0.03000000 sec  
 DELTA 1.89999998 sec  
 TD0 1

----- CHANNEL f1 -----  
 NUC1 13C  
 P1 8.00 usec  
 PL1 -3.00 dB  
 SFO1 75.4752953 MHz

----- CHANNEL f2 -----  
 CPDPRG2 waltz16  
 NUC2 1H  
 PCPD2 80.00 usec  
 PL2 -1.00 dB  
 PL12 16.23 dB  
 PL13 20.23 dB  
 SFO2 300.1312005 MHz

F2 - Processing parameters  
 SI 32768  
 SF 75.4677490 MHz  
 WDW EM  
 SSB 0  
 LB 1.00 Hz  
 GB 0  
 PC 1.40

## 3-methyl-5-(thiophen-2-yl)-1,3,4-oxadiazol-2(3H)-one (4t):

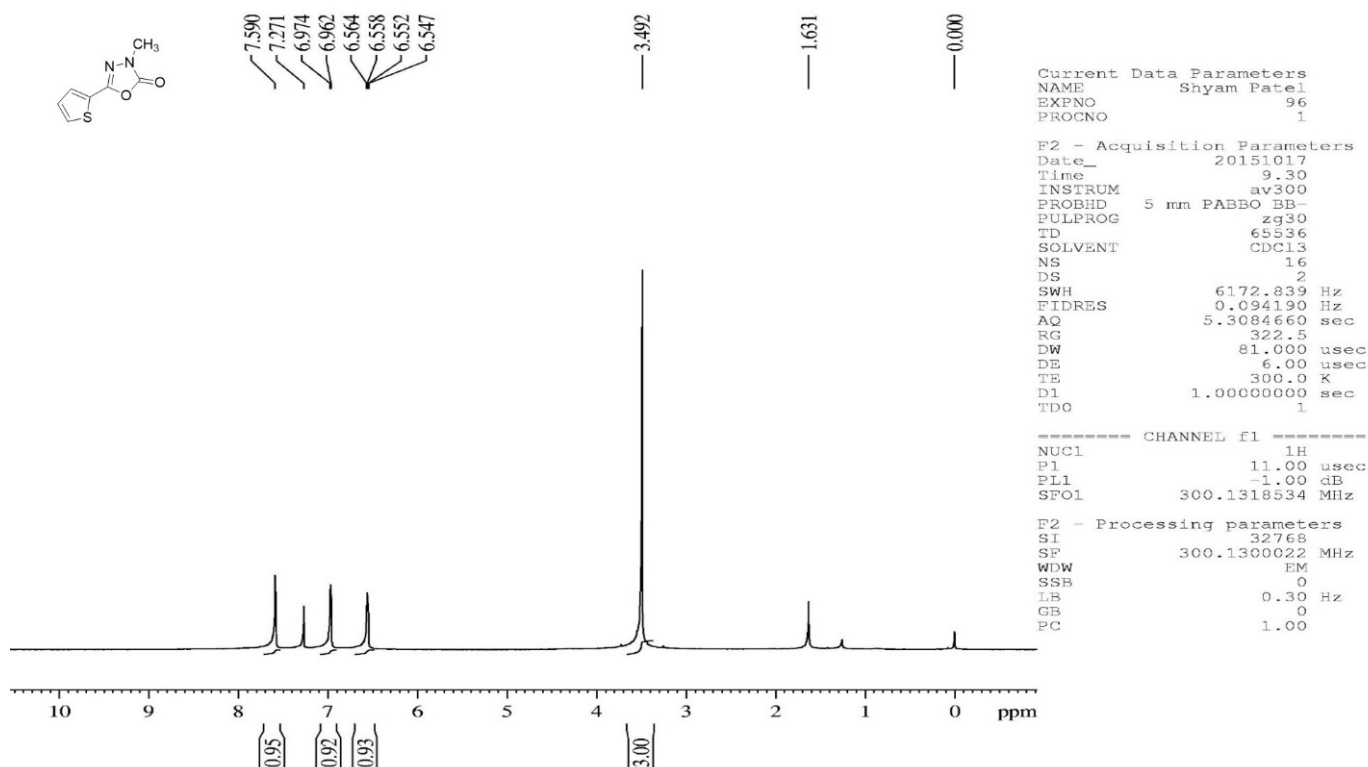

## 3-methyl-5-(thiophen-2-yl)-1,3,4-oxadiazol-2(3H)-one (4t):

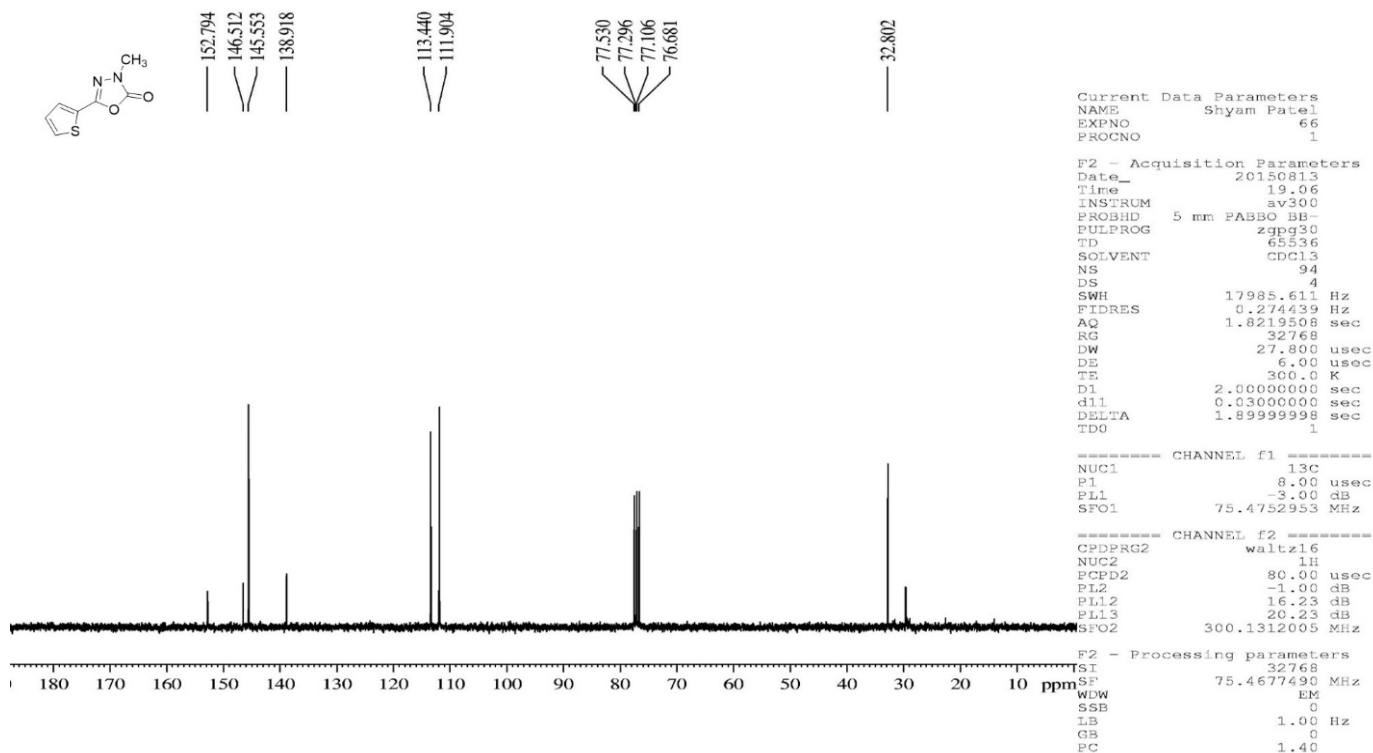

## 3-benzyl-5-phenyl-1,3,4-oxadiazol-2(3H)-one (5a):

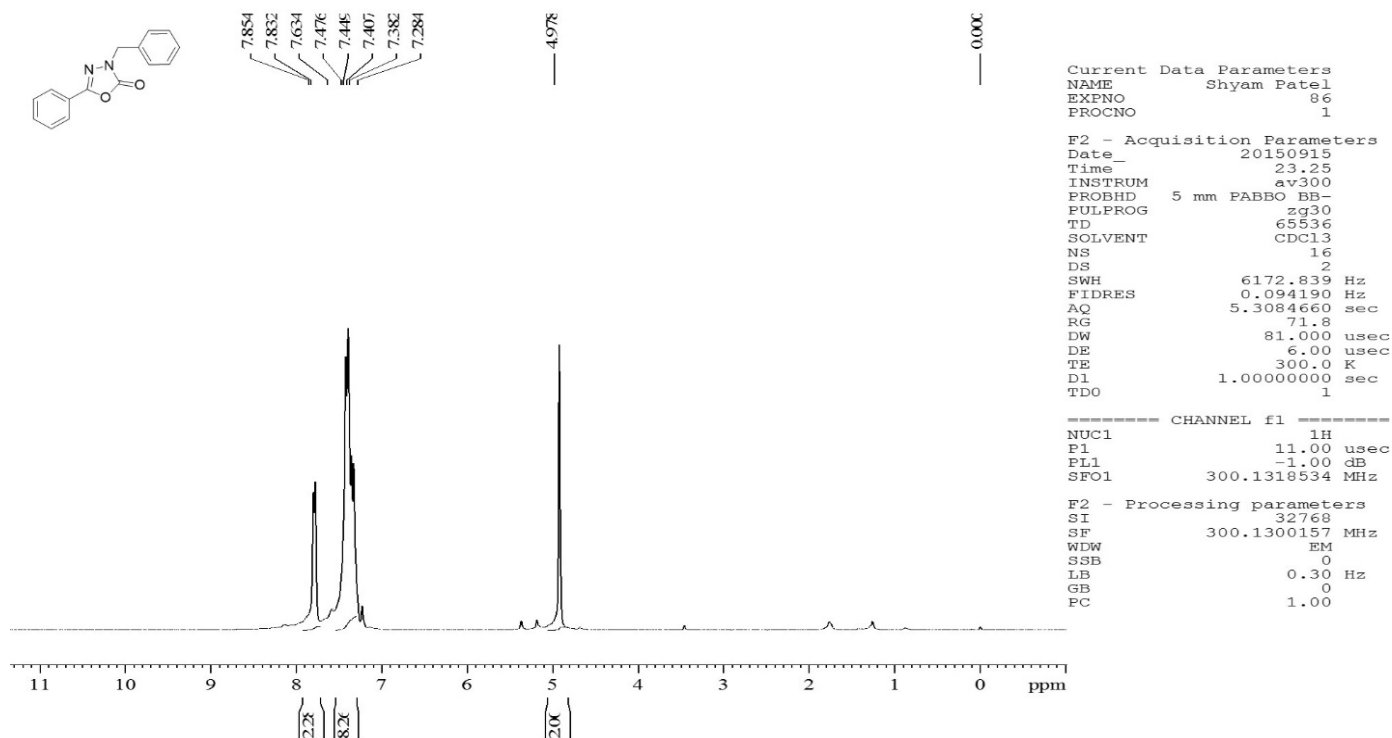

## 3-benzyl-5-phenyl-1,3,4-oxadiazol-2(3H)-one (5a):

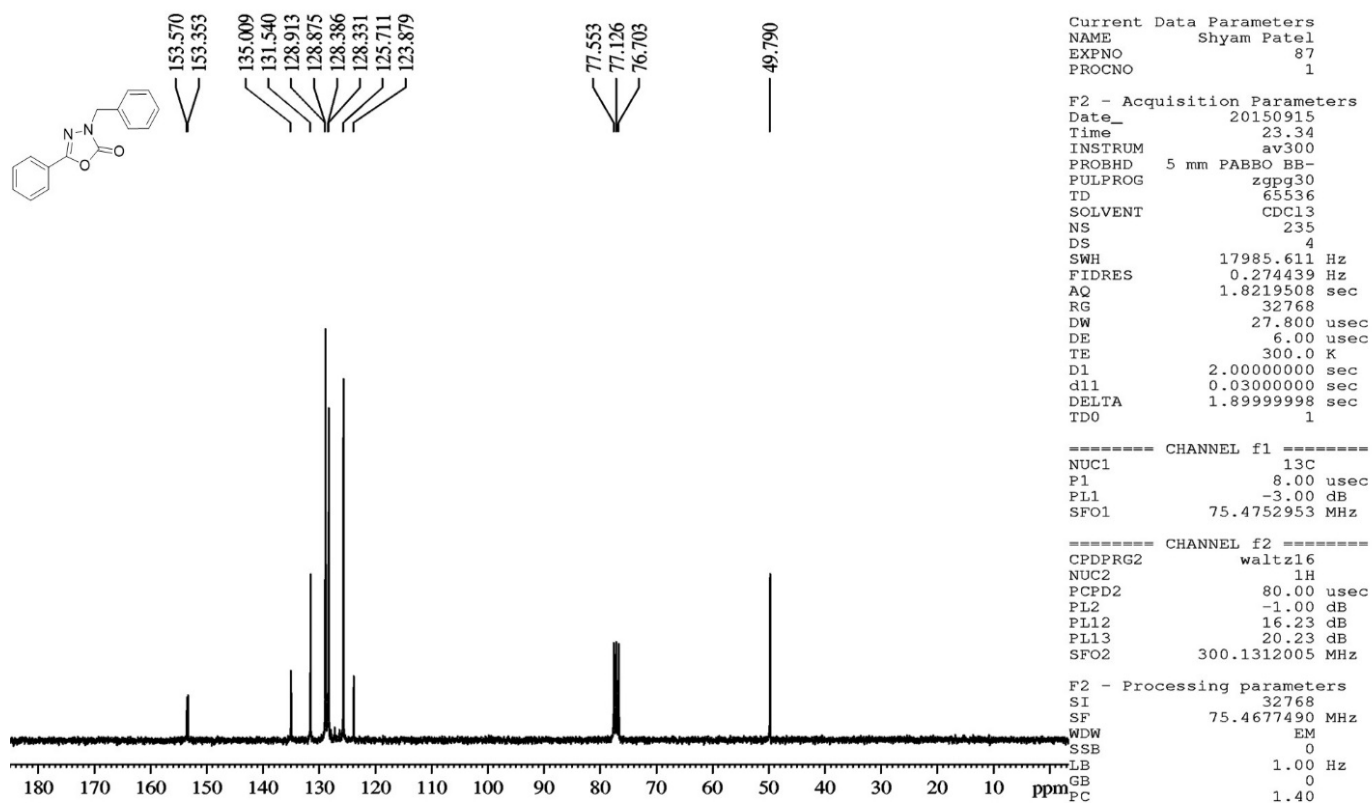

## 3-benzyl-5-(4-chlorophenyl)-1,3,4-oxadiazol-2(3H)-one (5b):

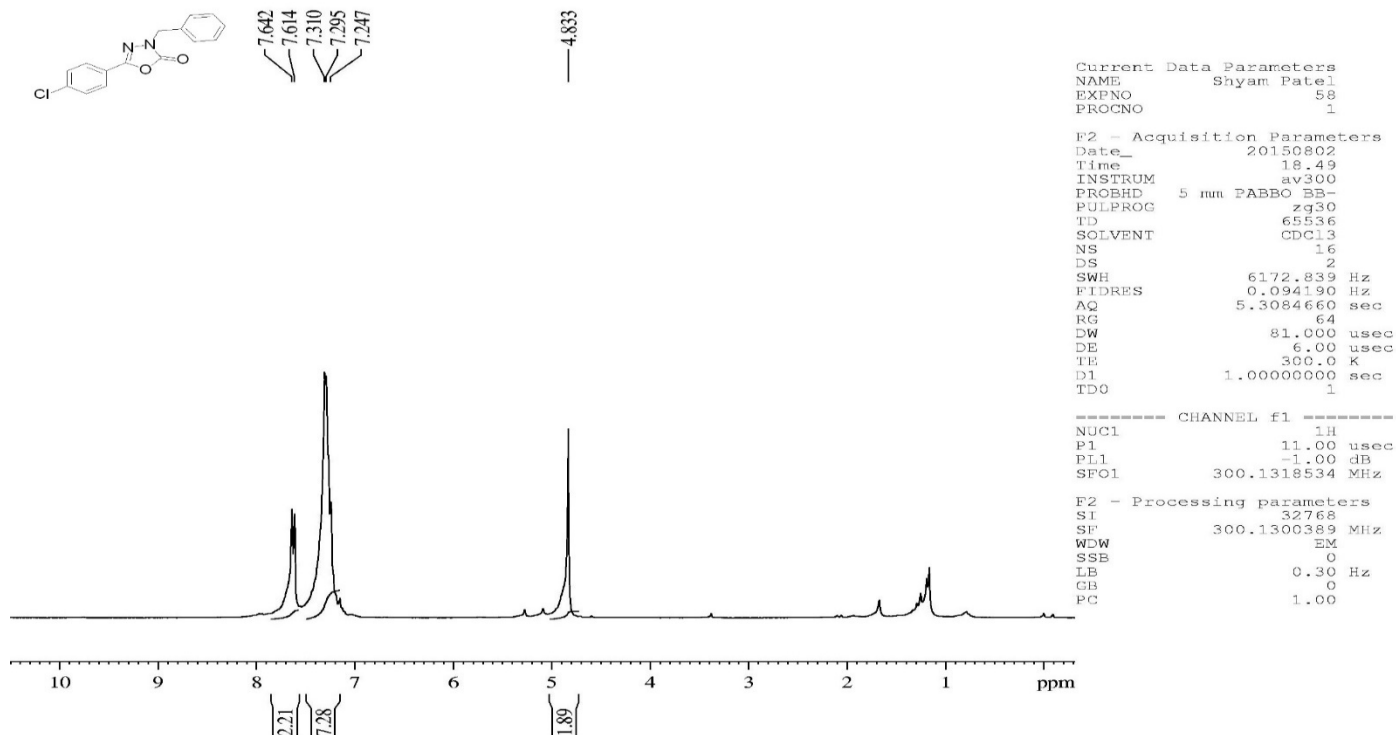

## 3-benzyl-5-(4-chlorophenyl)-1,3,4-oxadiazol-2(3H)-one (5b):

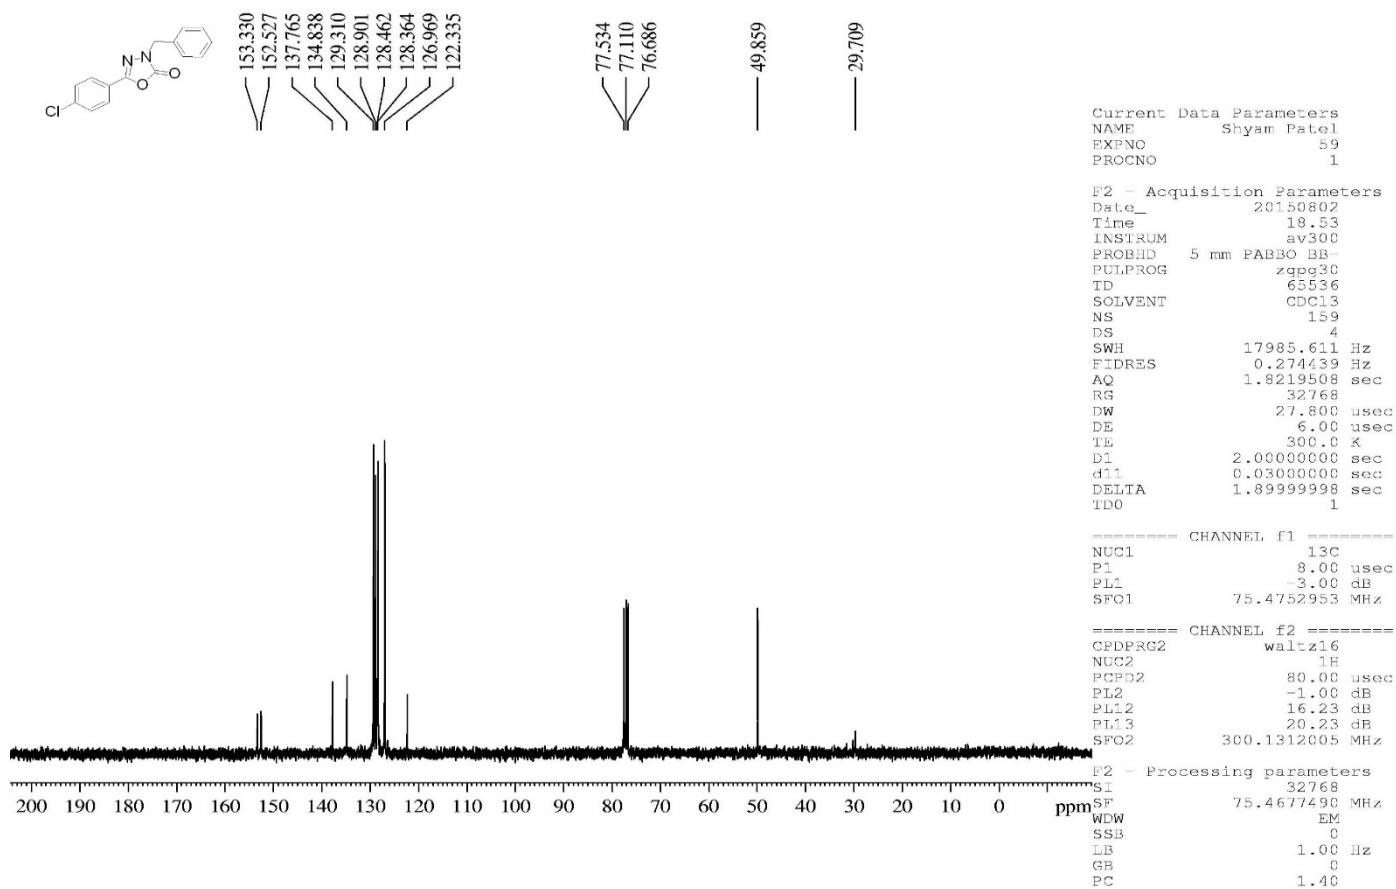

## 3-benzyl-5-(4-fluorophenyl)-1,3,4-oxadiazol-2(3H)-one (5c):

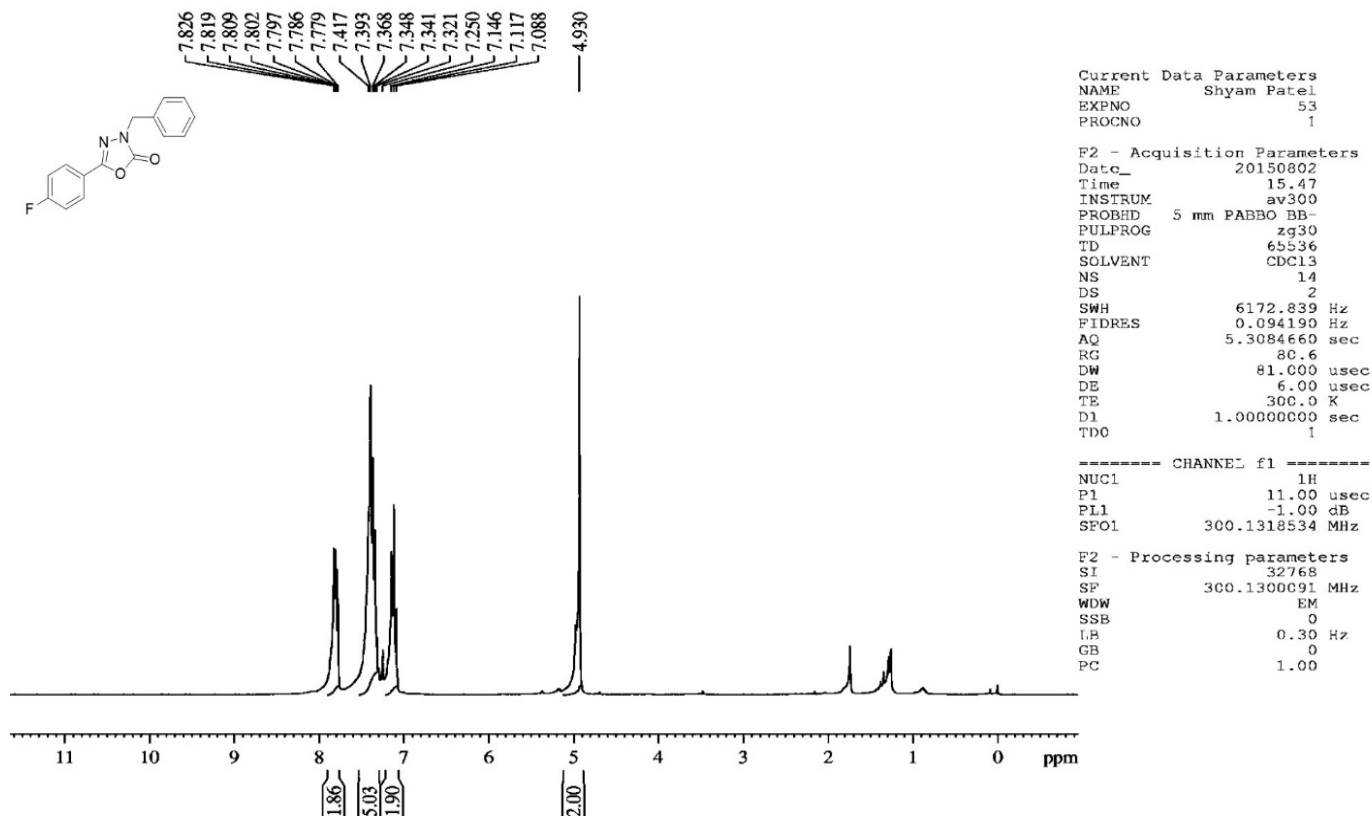

## 3-benzyl-5-(4-fluorophenyl)-1,3,4-oxadiazol-2(3H)-one (5c):

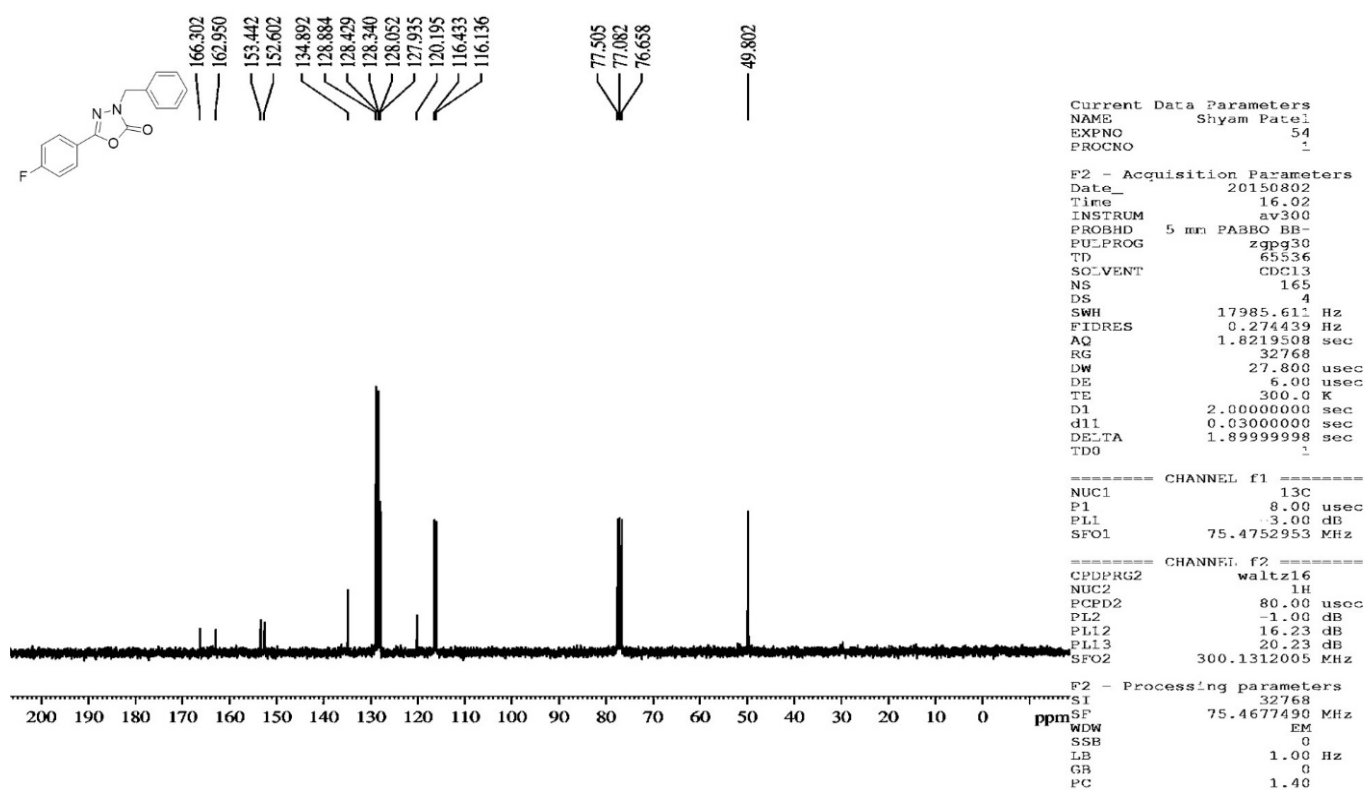

## 3-benzyl-5-(4-methoxyphenyl)-1,3,4-oxadiazol-2(3H)-one (5d):

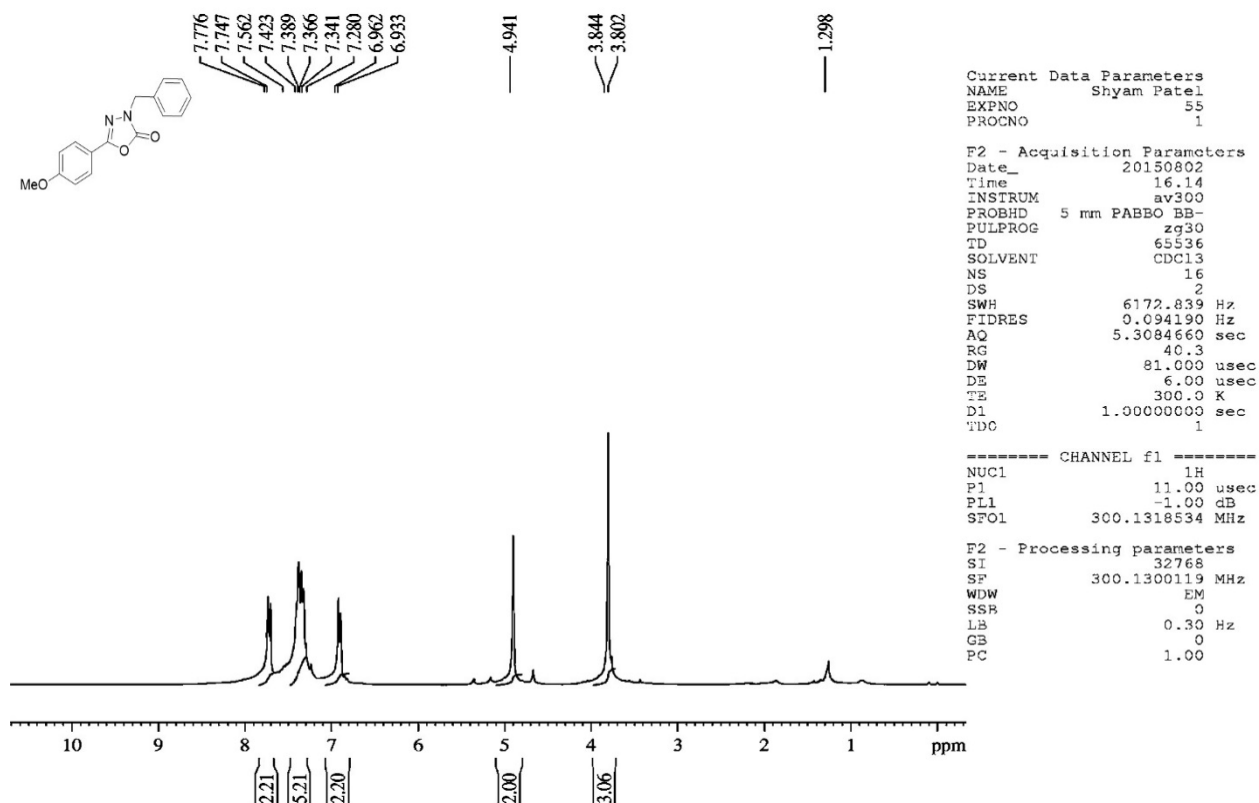

## 3-benzyl-5-(4-methoxyphenyl)-1,3,4-oxadiazol-2(3H)-one (5d):

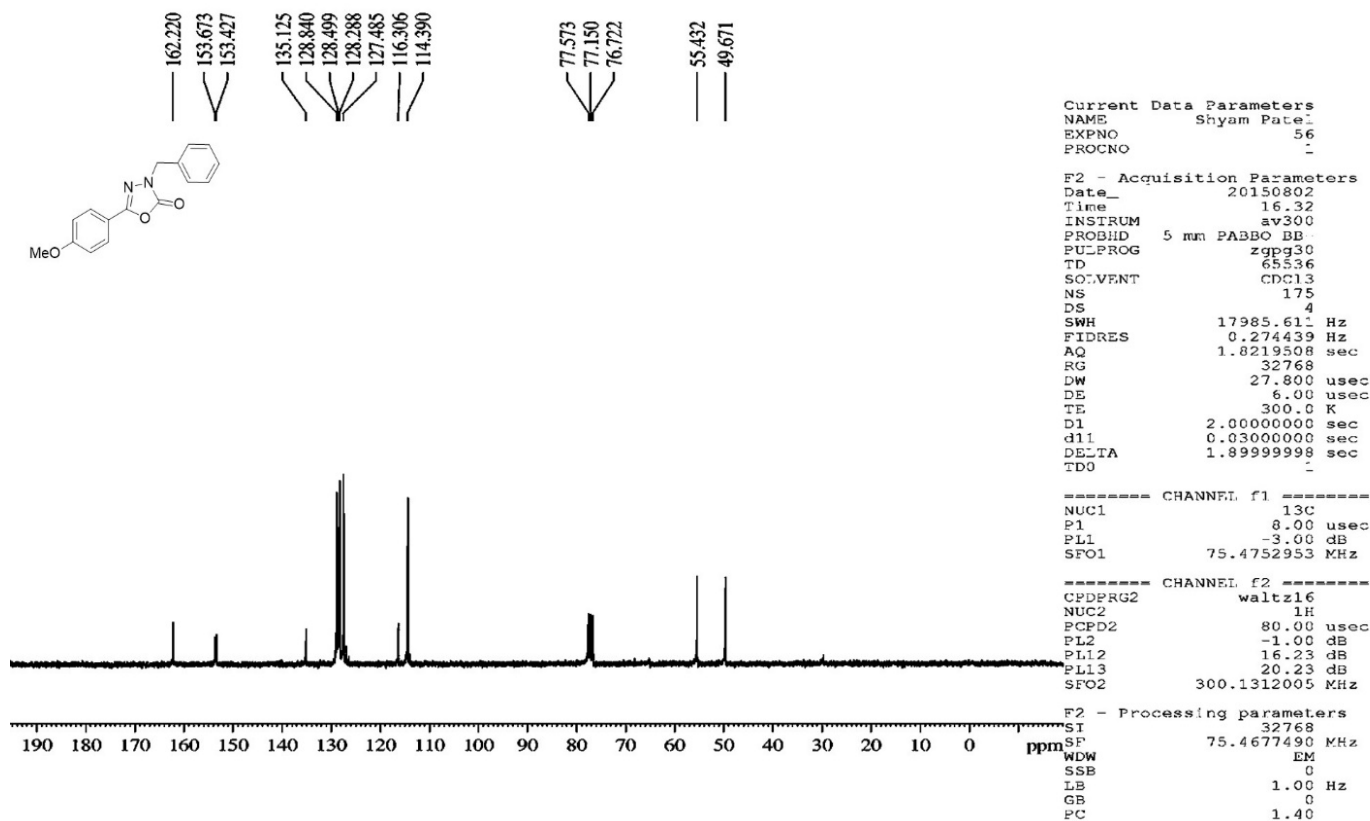

## 3-benzyl-5-(p-tolyl)-1,3,4-oxadiazol-2(3H)-one (5e):

14

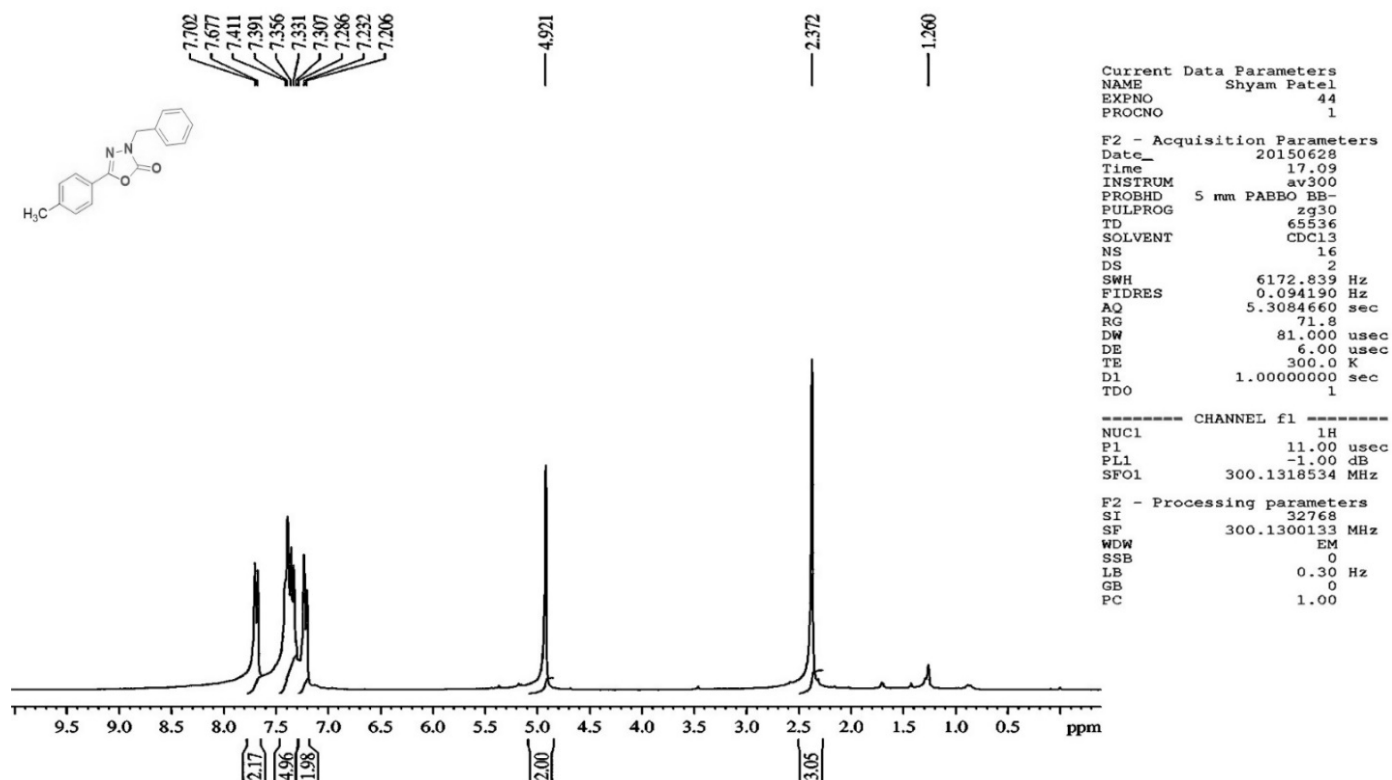

## 3-benzyl-5-(p-tolyl)-1,3,4-oxadiazol-2(3H)-one (5e):

14

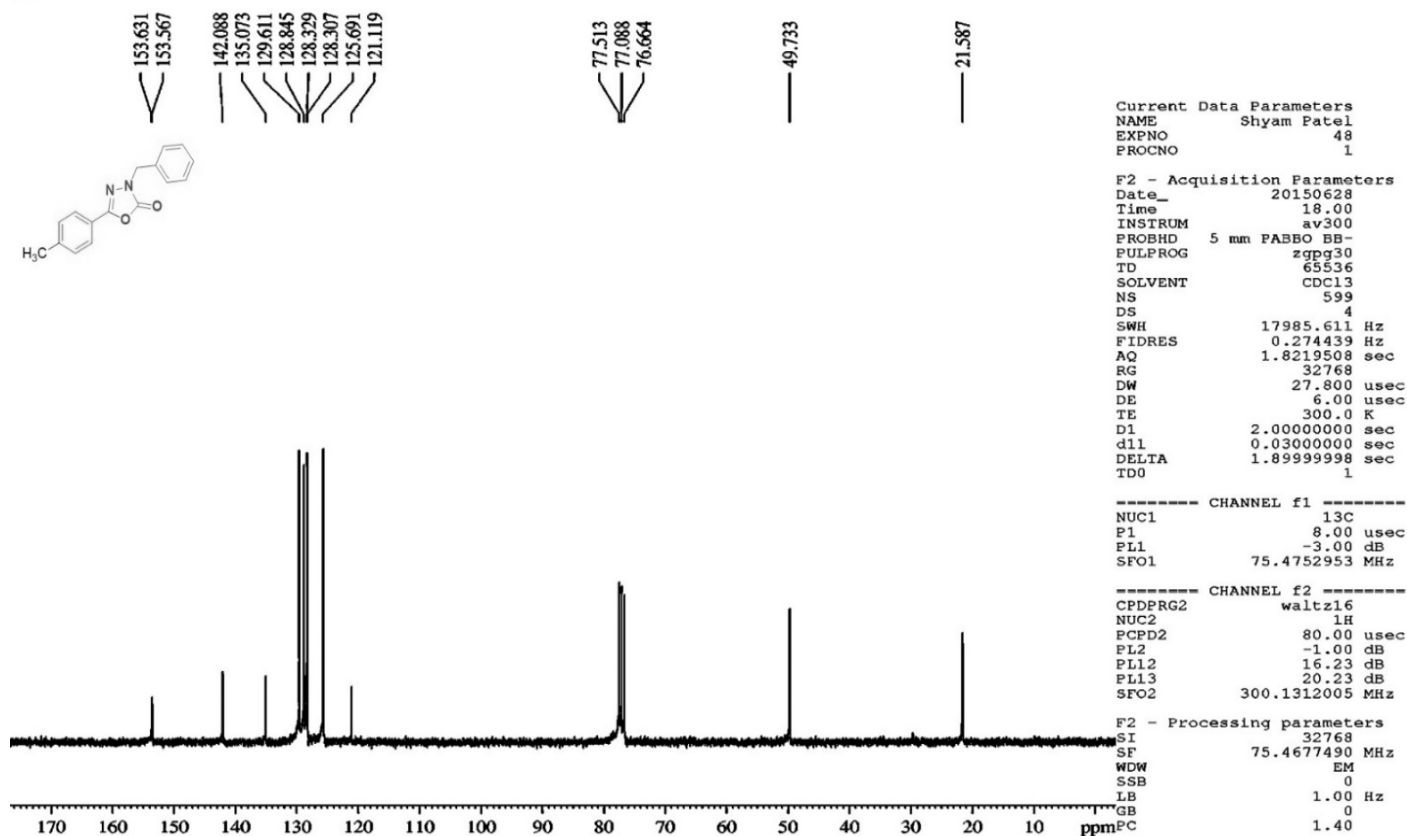



**3-benzyl-5-(3,4,5-trimethoxyphenyl)-1,3,4-oxadiazol-2(3H)-one (5f):**
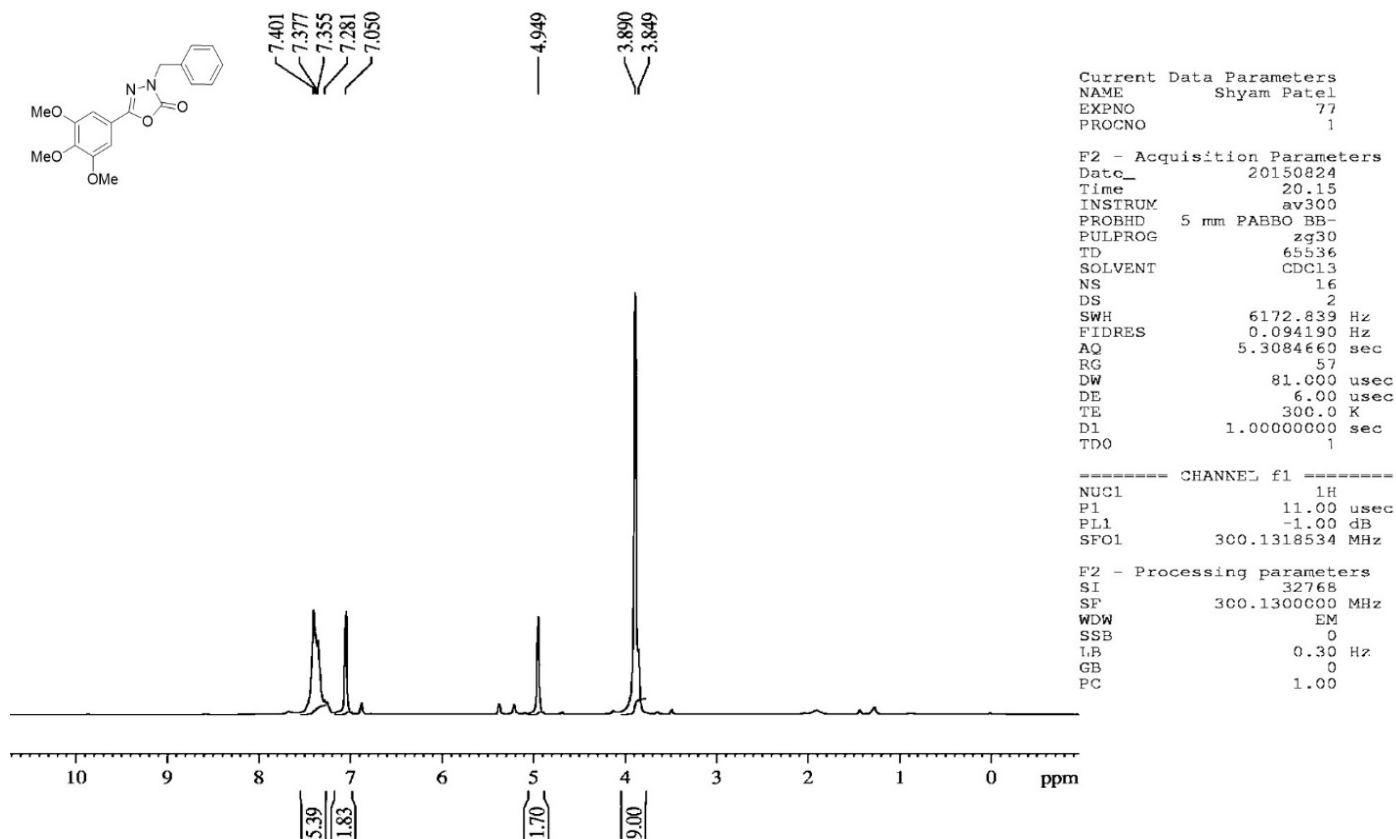
**3-benzyl-5-(3,4,5-trimethoxyphenyl)-1,3,4-oxadiazol-2(3H)-one (5f):**
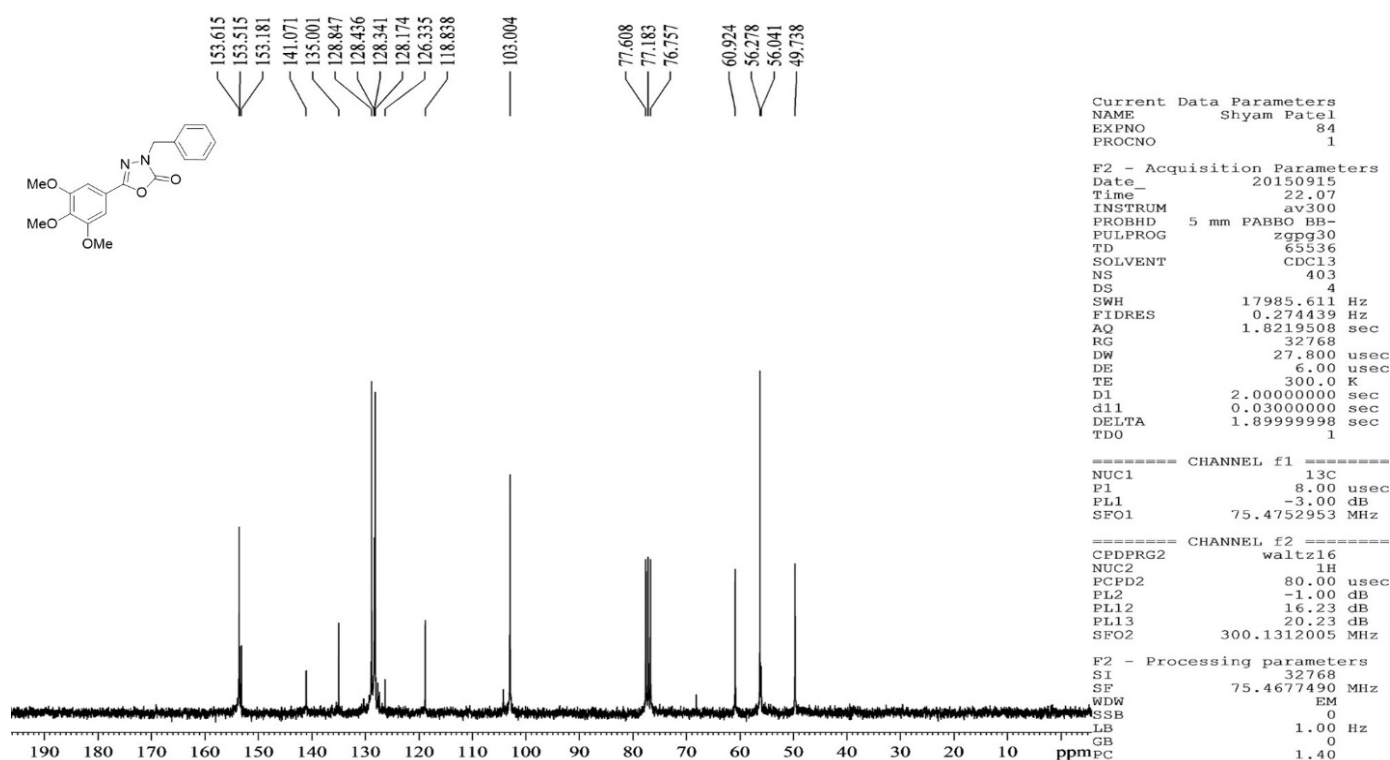

## 3-benzyl-5-(furan-2-yl)-1,3,4-oxadiazol-2(3H)-one (5g):

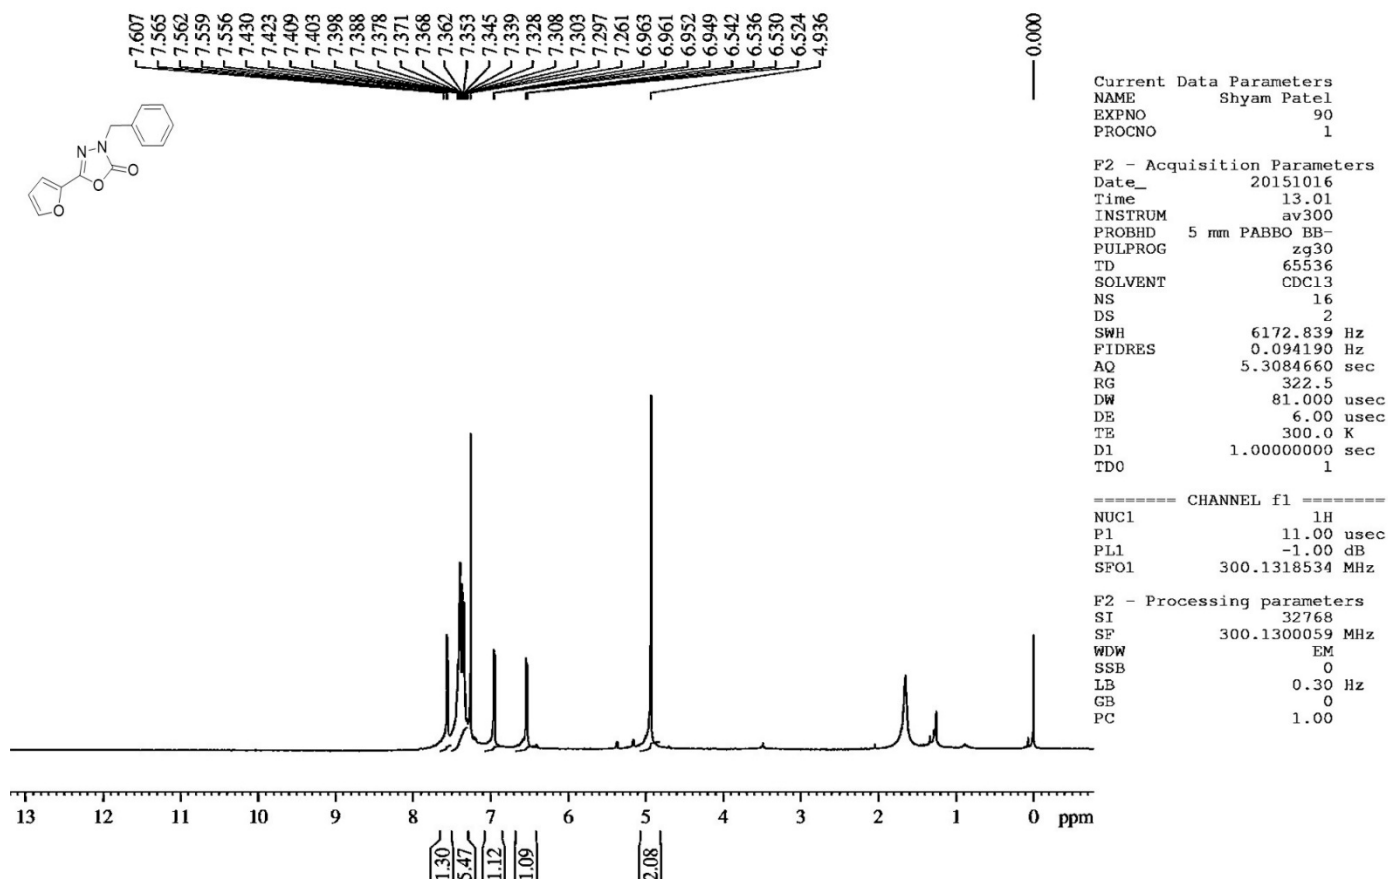

## 3-benzyl-5-(furan-2-yl)-1,3,4-oxadiazol-2(3H)-one (5g):

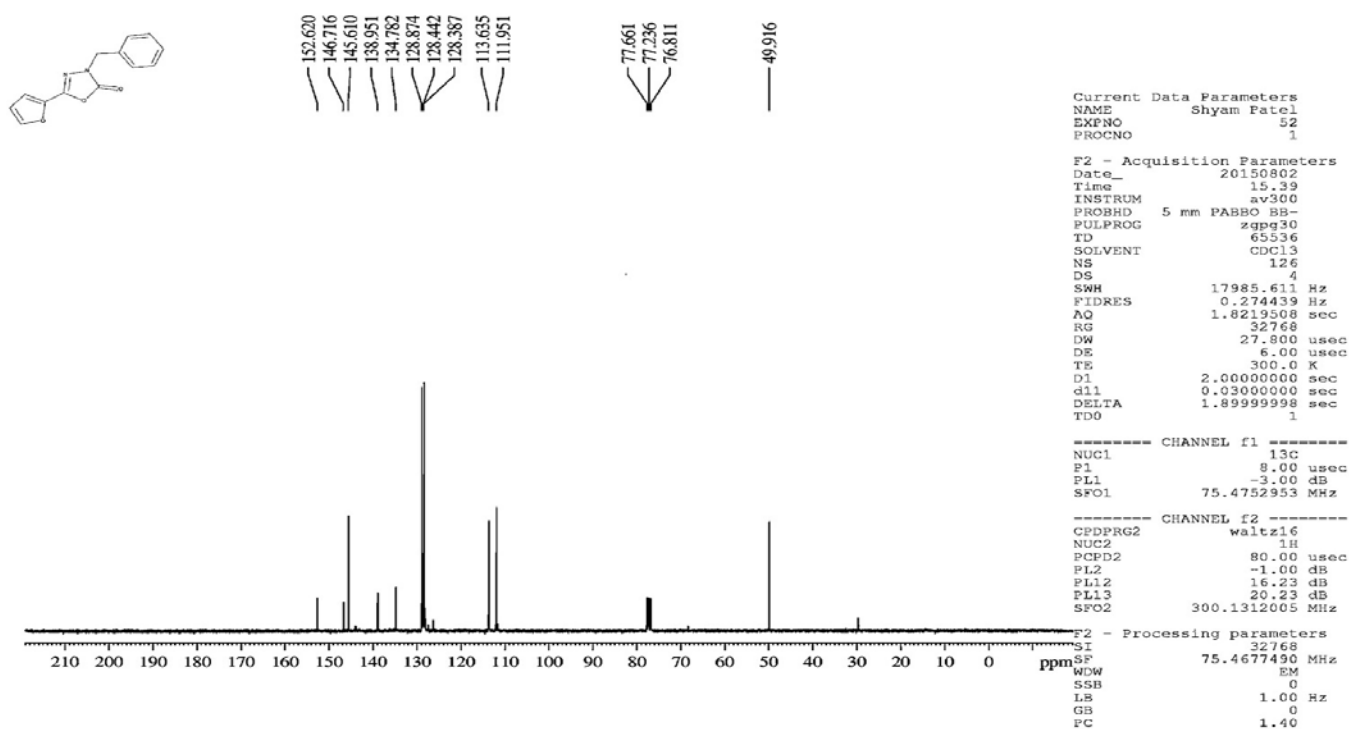

**3-benzyl-5-(1H-indol-3-yl)-1,3,4-oxadiazol-2(3H)-one (5h):**
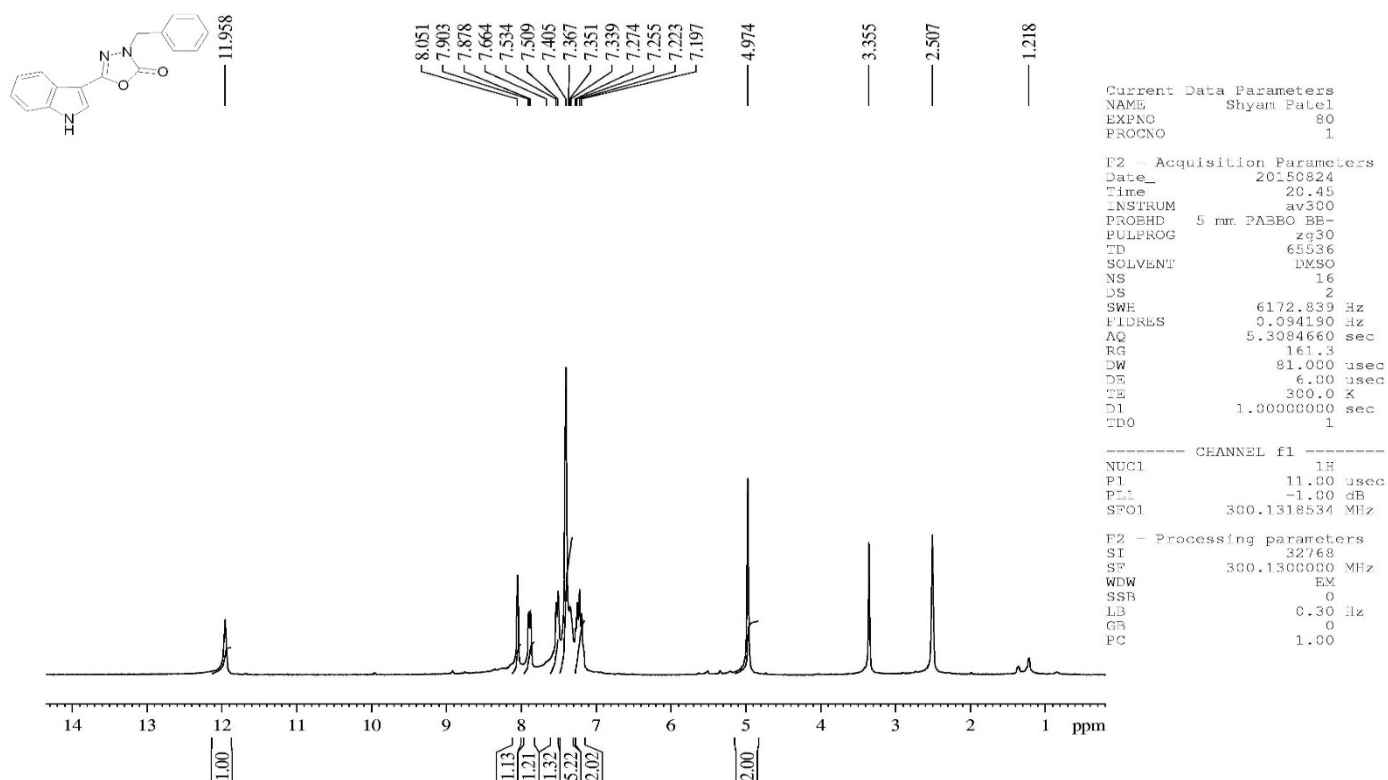
**3-benzyl-5-(1H-indol-3-yl)-1,3,4-oxadiazol-2(3H)-one (5h):**
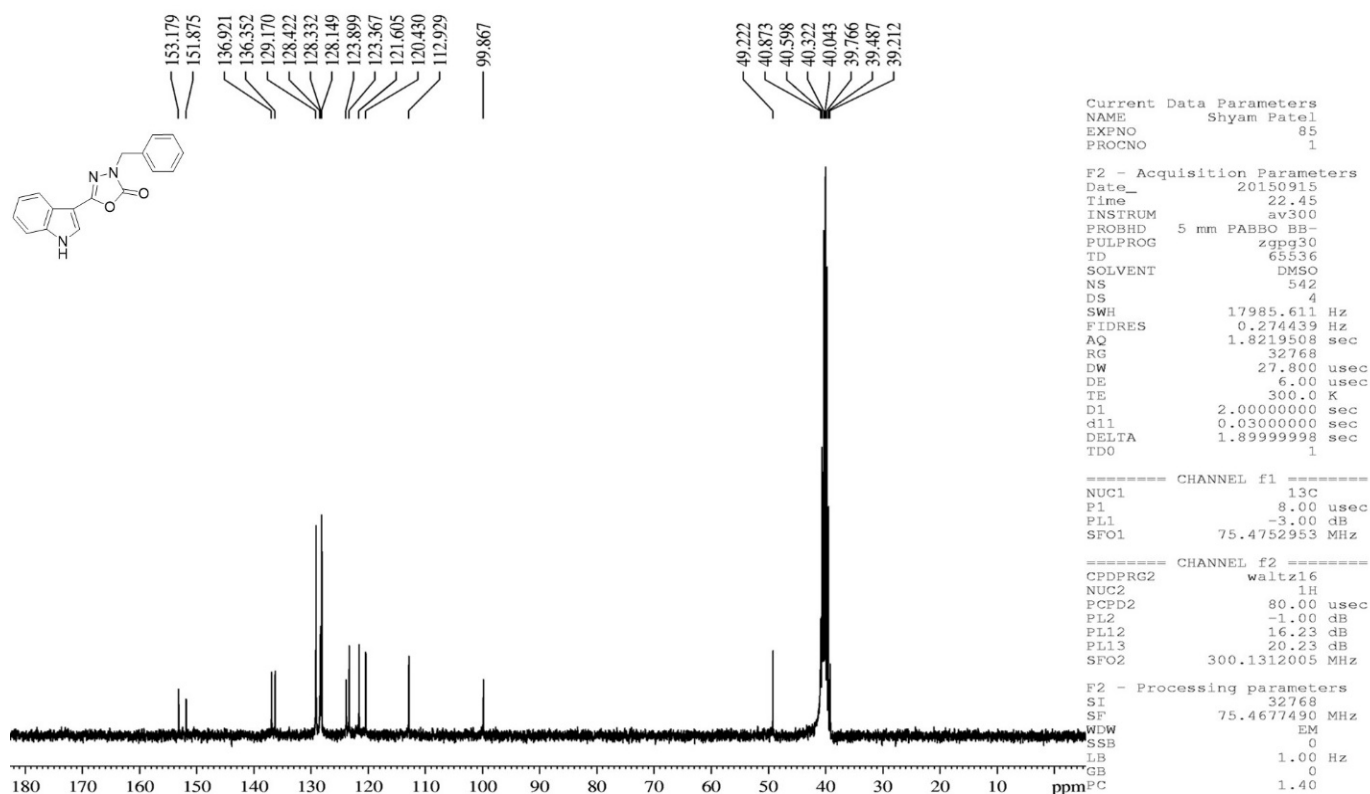

**Methyl 4-(4-benzyl-5-oxo-4,5-dihydro-1,3,4-oxadiazol-2-yl)benzoate (5i):**
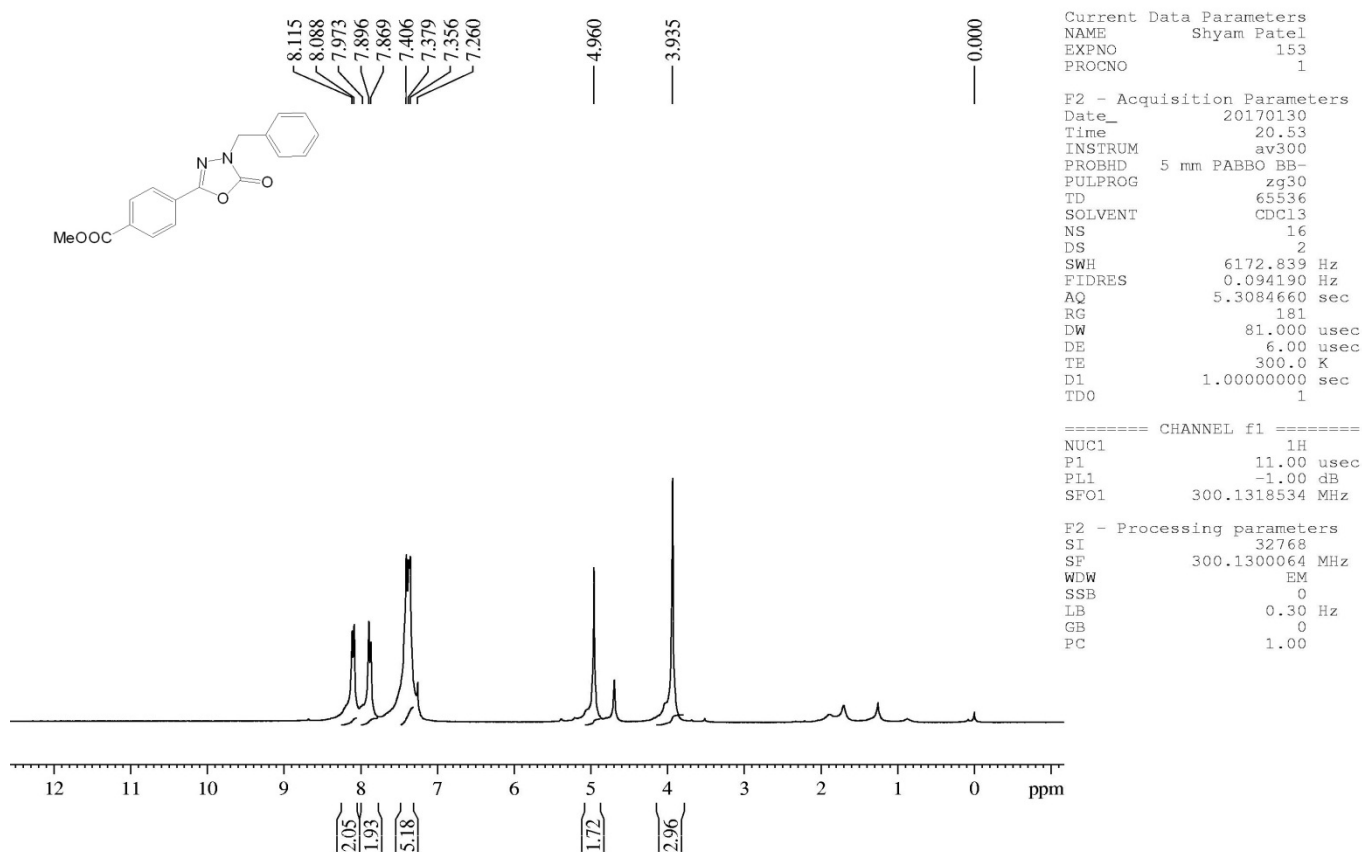
**Methyl 4-(4-benzyl-5-oxo-4,5-dihydro-1,3,4-oxadiazol-2-yl)benzoate (5i):**
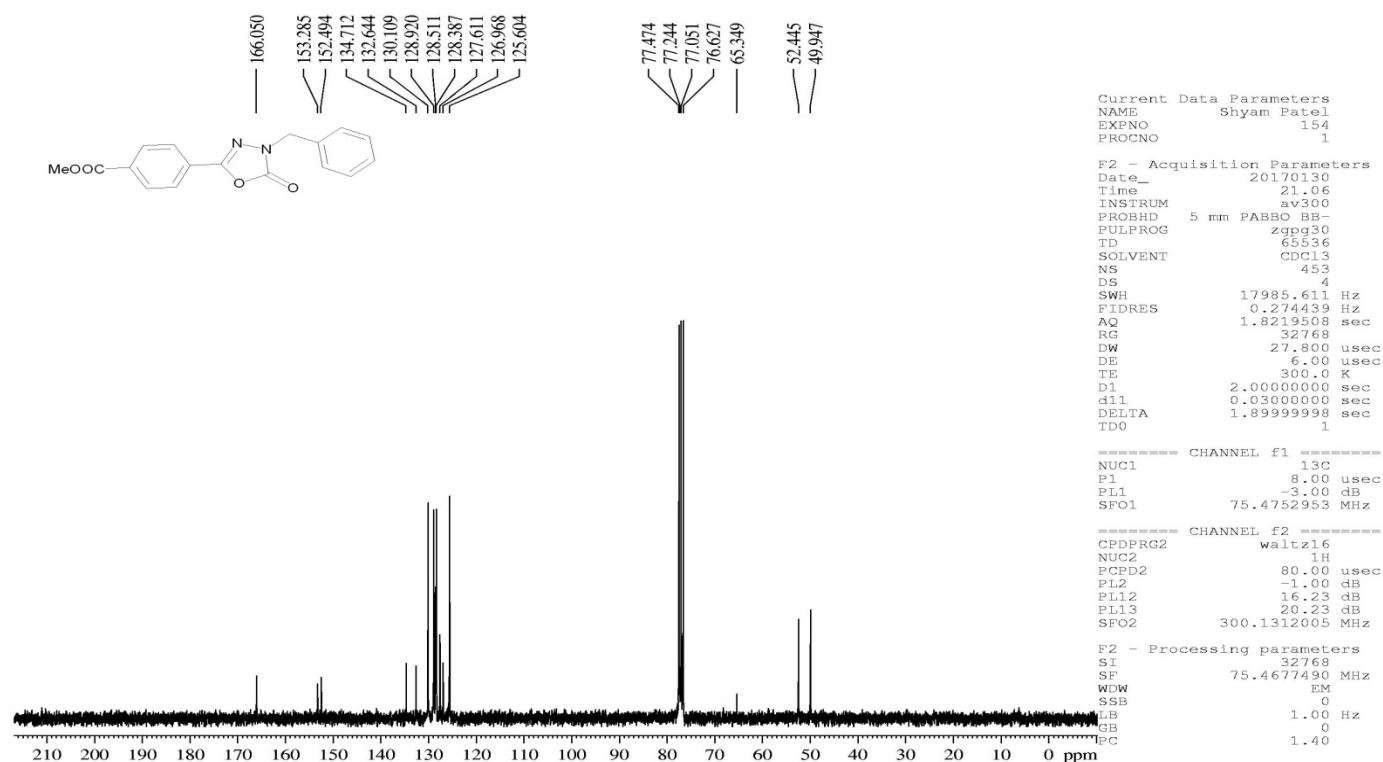

**2-methoxy-5-(3-nitrophenyl)-1,3,4-oxadiazole :**

Yield 17 mg, 16%; solid, m.p. 143-145 °C (lit.<sup>3</sup> m.p. 147 °C); <sup>1</sup>H NMR (300 MHz, CDCl<sub>3</sub>): 8.87 (d, 1H, *J* = 1.5 Hz), 8.45-8.37 (m, 2H), 7.67 (t, 1H), 4.0 (s, 3H)

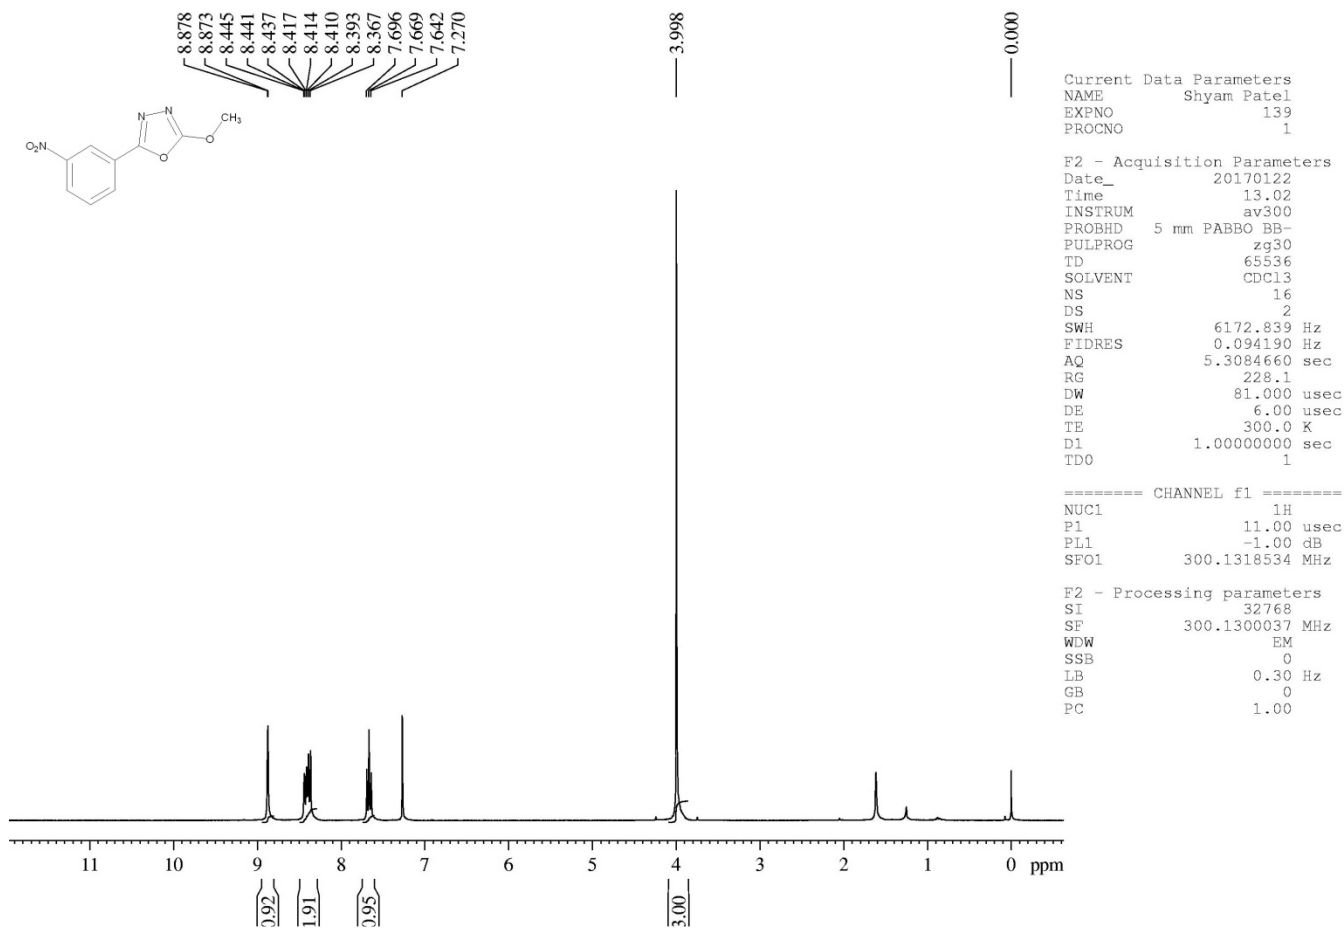**References:**

1. SADABS V2.10 (Sheldrick, G. M. 2003).
2. (a) Sheldrick, G. M. Acta Crystallogr., Sect. A: Found. Crystallogr., 1990, **46**, 467; (b) Sheldrick, G. M. SHELXL-NT Version 6.12, University of Gottingen, Germany, 2000
3. Shang, Z., Chu, Q., & Tan, S. *Synthesis.*, 2015, **47**, 1032-1040.
